# Supplementary material for: Antioxidant, Cytotoxic, and Antimicrobial Activities of Glycyrrhiza glabra L., Paeonia lactiflora Pall., and Eriobotrya japonica (Thunb.) Lindl. Extracts
Source: PubMed Central journal article supplement (PMC6631708; doi:10.3390/medicines6020043), 2019-03-30
Supplement: medicines-06-00043-s001.pdf [file medicines-06-00043-s001.pdf]

# Supplementary Materials: Antioxidant, Cytotoxic, and Antimicrobial Activities of *Glycyrrhiza glabra* L., *Paeonia lactiflora* Pall., and *Eriobotrya japonica* (Thunb.) Lindl. Extracts

Jun-Xian Zhou, Markus Santhosh Braun, Pille Wetterauer, Bernhard Wetterauer and Michael Wink

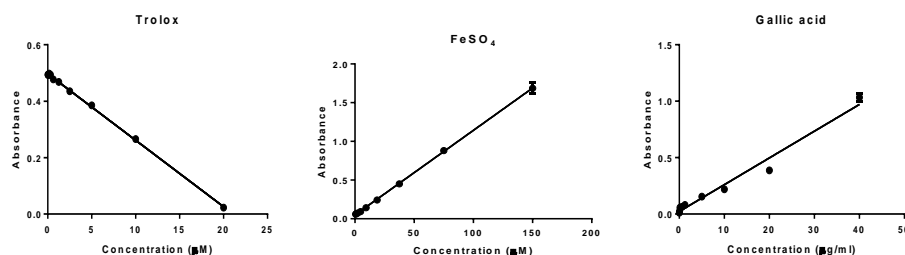

**Figure S1.** The standard curves in the TEAC, FRAP and Folin-Ciocateu assays shown as absorption vs. concentration. Results are expressed as the mean  $\pm$  SD from at least three independent experiments.

**Table S1.** Secondary metabolites in *Glycyrrhiza glabra*.

| Part | Class       | Plant Secondary Metabolites                                                                   | References  |
|------|-------------|-----------------------------------------------------------------------------------------------|-------------|
| Root | Triterpenes | Glycyrrhizic acid                                                                             | 1-6         |
|      |             | Gallic acid                                                                                   | 7           |
|      |             | Liquoric acid                                                                                 | 8           |
|      |             | Betulinic acid                                                                                | 9           |
|      |             | 18 $\alpha$ -Glycyrrhetic acid                                                                | 2,3,5,10-12 |
|      |             | 18 $\beta$ -Glycyrrhetic acid                                                                 |             |
|      |             | Ammonium glycyrrhinate                                                                        | 10          |
|      |             | Isoglabrolide                                                                                 | 13          |
|      |             | 21 $\alpha$ -Hydroxyisoglabrolide                                                             | 13          |
|      |             | Glabrolide                                                                                    | 13          |
|      |             | 11-Deoxyglabrolide                                                                            | 13          |
|      |             | Deoxyglabrolide                                                                               | 13          |
|      |             | Glycyrrhetol                                                                                  | 13          |
|      |             | 24-Hydroxyliquiritic acid                                                                     | 13          |
|      |             | Liquiridolic acid                                                                             | 13          |
|      |             | 28-Hydroxyglycyrrhetic acid                                                                   | 13          |
|      |             | 18 $\alpha$ -Hydroxyglycyrrhetic acid                                                         | 13          |
|      |             | Olean-11,13(18)-dien-3 $\beta$ -ol-30-oic acid and 3 $\beta$ -acetoxy-30-methyl ester         | 13          |
|      |             | Liquiritic acid                                                                               | 13          |
|      |             | Olean-12-en-3 $\beta$ -ol-30-oic acid                                                         | 13          |
|      |             | 24-Hydroxyglycyrrhetic acid                                                                   | 13          |
|      |             | 11-Deoxyglycyrrhetic acid                                                                     | 5,13        |
|      |             | 24-Hydroxy-11-deoxyglycyrrhetic acid                                                          | 13          |
|      |             | 11-Desoxyglycyrrhetic acid acetate methyl ester                                               | 14          |
|      |             | 24-Acetoxy-11-desoxyglycyrrhetic acid acetate methyl ester                                    | 14          |
|      |             | 11-Desoxyglabrolide acetate                                                                   | 14          |
|      |             | Glabrolide acetate                                                                            | 14          |
|      |             | 3 $\beta$ -Acetyl-18 $\beta$ -hydroxy-11-keto-olean-12-en-30-oic acid, 30,18 $\beta$ -lactone | 14          |
|      |             | 22 $\beta$ -Acetylglabric acid                                                                | 15          |
|      |             | Glycyrrholide I                                                                               | 15          |
|      |             | 3 $\beta$ -Acetyoxyglybrolide                                                                 | 15          |
|      |             | 3 $\beta$ -Acetyoxy-11-deoxyglybrolide                                                        | 15          |

|  |                               |                                                                         |         |
|--|-------------------------------|-------------------------------------------------------------------------|---------|
|  |                               | 3-Acetyoxy-11-deoxy-glycyrrhetic acid                                   | 15      |
|  |                               | Methyl-24-hydroxy-11-deoxy-glycyrrhetate                                | 15      |
|  |                               | Triphyllic acid                                                         | 15      |
|  |                               | Isomacedonic acid                                                       | 15      |
|  |                               | Licorice saponin A3                                                     | 5,16    |
|  |                               | Licorice saponin C2                                                     | 5       |
|  |                               | Licorice saponin G2                                                     | 5,16,17 |
|  |                               | Licorice saponin J2                                                     | 5       |
|  |                               | Glycyrrhizin isomer                                                     | 5       |
|  |                               | 22-Acetoxyglycyrrhizin                                                  | 5       |
|  |                               | 24-Hydroxylicorice saponin A3                                           | 16      |
|  |                               | 22 $\beta$ -Acetoxyl-glycyrrhizin                                       | 16      |
|  |                               | Licorice saponin M3                                                     | 16      |
|  |                               | Licorice saponin N4                                                     | 16      |
|  |                               | Licorice saponin O4                                                     | 16      |
|  |                               | 18 $\alpha$ -Licorice saponin G2                                        | 18      |
|  |                               | Macedonoside A                                                          | 18      |
|  |                               | 29-Hydroxy-glycyrrhizin                                                 | 18      |
|  |                               | Licorice saponin K2/H2                                                  | 17      |
|  |                               | Licorice saponin B2                                                     | 17      |
|  |                               | $\beta$ -Sitosterol                                                     | 19      |
|  |                               | 11-Deoxoglycyrrhizin                                                    | 6       |
|  |                               | 24-Hydroxyglycyrrhizin                                                  | 6       |
|  |                               | Glucoglycyrrhizin                                                       | 6       |
|  |                               | Araboglycyrrhizin                                                       | 6       |
|  |                               | Apioglycyrrhizin                                                        | 6       |
|  |                               | Glycyrrhetic acid-monoglucuronide                                       | 6       |
|  |                               | 11-Deoxy-11,13-glycyrrhizindiene                                        | 6       |
|  | Monodesmosidic saponins       | 30-Hydroxyglycyrrhizin                                                  | 18      |
|  |                               | Glycyrrhizin-20-methanoate                                              | 6       |
|  |                               | 24-Hydroxyglucoglycyrrhizin                                             | 6       |
|  |                               | Rhaoglycyrrhizin                                                        | 6       |
|  |                               | 11-Deoxorhaoglycyrrhizin                                                | 6       |
|  |                               | Rhaogluoglycyrrhizin                                                    | 6       |
|  |                               | Rhaogalactoglycyrrhizin                                                 | 6       |
|  |                               | 11-Deoxy-20 $\alpha$ -glycyrrhizin                                      | 6       |
|  |                               | 20 $\alpha$ -Galacturonoylglycyrrhizin                                  | 6       |
|  | 20 $\alpha$ -Rhaoglycyrrhizin | 6                                                                       |         |
|  | Sesquiterpenes                | $\beta$ -Caryophyllene                                                  | 20      |
|  |                               | $\beta$ -Caryophyllene oxide                                            | 20      |
|  |                               | Himachalene epoxide                                                     | 20      |
|  |                               | (1R,3E,7E,11R)-1,5,5,8-tetramethyl-12-oxabicyclo[9.1.0]dodeca-3,7-diene | 21      |
|  |                               | Caryophyllene oxide                                                     | 21      |
|  | Monoterpenes                  | Camphor                                                                 | 22      |
|  |                               | (Z)-Pinene hydrate                                                      | 20      |
|  |                               | Terpinen-4-ol                                                           | 20      |
|  | Isoflavones                   | Formononetin                                                            | 6,23-25 |
|  |                               | Prunetin                                                                | 27      |
|  |                               | Glabrone                                                                | 28,29   |
|  |                               | Glyzarin                                                                | 30      |
|  |                               | Licoisoflavone A                                                        | 31      |
|  |                               | Glycyrrhisoflavanone                                                    | 32      |
|  |                               | Glycyrrhisoflavone                                                      | 32      |
|  |                               | Glycyrrhisoflavanone diacetate                                          | 32      |
|  |                               | Glycyrrhisoflavanone tricetate                                          | 32      |
|  |                               | Glycyrrhisoflavone tetraacetate                                         | 32      |
|  |                               | Licoisoflavone A                                                        | 32      |
|  | Glisoflavone                  | 33                                                                      |         |

|                                    |                                                                             |                     |
|------------------------------------|-----------------------------------------------------------------------------|---------------------|
|                                    | 6,8-Di-(dimethylallyl)-genistein                                            | 34                  |
|                                    | 3',6-Di-(dimethylallyl)-genistein                                           | 34                  |
|                                    | Licoisoflavone B                                                            | 34                  |
|                                    | Licoisoflavanone                                                            | 34                  |
|                                    | Shinpterocarpin                                                             | 29,35               |
|                                    | Glabrone                                                                    | 15                  |
|                                    | Glyzaglabrin                                                                | 36                  |
|                                    | Glabroisoflavanone A                                                        | 37                  |
|                                    | Glabroisoflavanone B                                                        | 37                  |
|                                    | Genistein                                                                   | 6                   |
|                                    | Daidzin                                                                     | 6                   |
|                                    | Genistin                                                                    | 6                   |
|                                    | Daidzein                                                                    | 6                   |
|                                    | Glycitein                                                                   | 6                   |
|                                    | Coumestrol                                                                  | 6                   |
|                                    | O-Methylshinpterocarpin                                                     | 29                  |
|                                    | Gancaonin L                                                                 | 29                  |
|                                    | 7,8-Dihydroxy-4'-methoxy-6-prenylisoflavanone                               | 29                  |
|                                    | 2',3-Dihydroxy-4'-methoxy-3'',3''-dimethylpyrano [2'',3'':7,8] isoflavanone | 29                  |
|                                    | Erybacin B                                                                  | 38                  |
|                                    | Parvisoflavones A                                                           | 38                  |
| 2-Methylisoflavones                | 7-Atetoxo-2-methylisoflavone                                                | 39                  |
|                                    | 7-Methoxy-2-methylisoflavone                                                | 39                  |
|                                    | 7-Hydroxy-2-methylisoflavone                                                | 39                  |
| Isoprenoid-substituted isoflavones | Kanzonol T                                                                  | 34                  |
| Isoflavone glycosides              | Ononin                                                                      | 6,40                |
| Isoflavans                         | Glabridin                                                                   | 5,17,24,29,35,41-44 |
|                                    | 4'-O-Methylglabridin                                                        | 24,29,35,42,45      |
|                                    | Hispaglabridin A                                                            | 17,24,29,35,42      |
|                                    | Hispaglabridin B                                                            | 24,29,42            |
|                                    | Phaseollinisoflavan                                                         | 24                  |
|                                    | 3'-Methoxy-glabridin                                                        | 15                  |
|                                    | 8-Prenyl-phaseollinisoflavan                                                | 42                  |
|                                    | 3'-Hydroxy-4-O-methylglabridin                                              | 29,42               |
|                                    | 5'-Formyl glabridin                                                         | 29                  |
|                                    | 4''-Hydroxyglabridin                                                        | 29                  |
| (3R)-Vestitol                      | 29                                                                          |                     |
|                                    | 8-Hydroxymethyl-8-methyl-3,4-dihydro-2H,8H-Pyrano[2,3-f]-chromon-3-ol       | 29                  |
| Hydroxyisoflavans                  | Licoricidin                                                                 | 46                  |
| Dipyranoisoflavans                 | Glyinflarin K                                                               | 47                  |
| Prenylated isoflavans              | Kanzonol R                                                                  | 48                  |
| Diprenylated isoflavans            | Kanzonol X                                                                  | 29,35               |
|                                    | (3R)-2,3',7-Trihydroxy-4'-methoxyisoflavan                                  | 29                  |
| Isoflavene                         | Glabrene                                                                    | 5,24,28,29,35       |
| Isoflavene derivatives             | 3,4-Didehydroglabridin                                                      | 37                  |
| Pterocarpans                       | Medicarpin                                                                  | 47                  |
|                                    | Icoagrocarpin                                                               | 29                  |
|                                    | Kanzonol F                                                                  | 5                   |
| Chalcones and chalcone derivatives | Licochalcone A                                                              | 34,49,50            |
|                                    | Licochalcone B                                                              | 5,49                |
|                                    | Licuroside                                                                  | 5,51                |

|                                   |                                                                                                      |               |
|-----------------------------------|------------------------------------------------------------------------------------------------------|---------------|
|                                   | Neoisoliquiritin                                                                                     | 51            |
|                                   | Echinatin                                                                                            | 29,51         |
|                                   | Isoliquiritin                                                                                        | 35,40         |
|                                   | Glyinflanin G                                                                                        | 35            |
|                                   | Kanzonol Y                                                                                           | 5,17,29,35,47 |
|                                   | Rhamnoisoliquiritin                                                                                  | 15            |
|                                   | 3, 3'-Di- $\gamma,\gamma$ -dimethylallyl-2'-4,4'-trihydroxychalcone                                  | 52            |
|                                   | [6'',6''-Dimethylpyrano(2'',3'':4,5)]-3'- $\gamma,\gamma$ -dimethylallyl-2',3,4'-trihydroxychalcone  | 29,52         |
|                                   | Licuraside (neolicucuroside)                                                                         | 5,47          |
|                                   | 2,3,4-Trihydroxy-4'-methoxychalcone                                                                  | 53            |
|                                   | 2,4,4'-Trihydroxychalcone                                                                            | 53            |
|                                   | 3,3',4,4'-Tetrahydroxy-2'-methoxy-5-prenylchalcone                                                   | 29            |
|                                   | 2,3',4,4'-Tetrahydroxy-3,5'-diprenylchalcone                                                         | 29            |
|                                   | 2,3',4,4', $\alpha$ -Pentahydroxy-3,5'-diprenyl-dihydrochalcone                                      | 29            |
|                                   | 2,3',4,4', $\alpha$ -Pentahydroxy-3-prenyl-dihydrochalcone                                           | 29            |
|                                   | Morachalcone A                                                                                       | 29            |
|                                   | Isoliquiritigenin                                                                                    | 5,54-57       |
|                                   | Licorice glycoside A                                                                                 | 5,            |
|                                   | 2,4,4'-Trimethoxychalcone                                                                            | 17            |
|                                   | Glyinflanin A                                                                                        | 17            |
|                                   | Licoflavone B                                                                                        | 17            |
|                                   | Glycyrdione B                                                                                        | 17            |
|                                   | Glyinflanin D or G                                                                                   | 17            |
|                                   | Licochalcone D                                                                                       | 17            |
| Retrochalcones                    | Lichochalcone B (3, 4, 4'-trihydroxy-2-methoxychalcone)                                              | 29            |
| Hydroxydihydrochalcones           | 1-(2,4-Dihydroxyphenyl)-2-hydroxy-3-(4'-hydroxyphenyl)-1-propanone                                   | 53            |
|                                   | 1-(2,4-Dihydroxyphenyl)-3-hydroxy-3-(4'-hydroxyphenyl)-1-propanone                                   | 53            |
| Hydroxydihydrochalcone glucosides | 1-(2,4-Dihydroxyphenyl)-3-hydroxy-3-(4'-hydroxyphenyl)-4'-O- $\beta$ -D-glucopyranoside)-1-propanone | 53            |
|                                   | 1-(2,4-Dihydroxyphenyl)-4-O- $\beta$ -D-glucopyranoside)-3-hydroxy-3-(4'-hydroxyphenyl)-1-propanone  | 53            |
| Flavonosides                      | Liquiritoside                                                                                        | 58            |
| Flavonoids                        | Pinocembrin                                                                                          | 27            |
|                                   | Glyasperin M                                                                                         | 34            |
|                                   | Euchrenone as                                                                                        | 29,47         |
|                                   | Rhamnoliquiritin                                                                                     | 59            |
| Flavonoid dimer                   | Glabridin + sophoracoumestan A                                                                       | 17            |
|                                   | Glabridin + sophoracoumestan A                                                                       | 17            |
|                                   | Glabrone + glabridin                                                                                 | 17            |
|                                   | Glabrone + glabridin                                                                                 | 17            |
| Isoprenoid-substituted flavonoids | Gancaonin F                                                                                          | 60            |
|                                   | Gancaonin G                                                                                          | 34,60         |
|                                   | Gancaonin H                                                                                          | 34,60         |
|                                   | Gancaonin I                                                                                          | 60            |
| 2-Arylbenzofuran flavonoids       | Licocoumarone                                                                                        | 33,61         |
|                                   | Kanzonol U                                                                                           | 29,35         |
|                                   | Kanzonol V                                                                                           | 35            |
|                                   | Glabrocoumarone A                                                                                    | 52            |
|                                   | Glabrocoumarone B                                                                                    | 52            |
|                                   | $\omega$ -Hydroxymoracin N                                                                           | 17            |
| 2-Arylbenzofuran dimer            | Lespedezol B3                                                                                        | 17            |
| Flavonols                         | Licoflavonol                                                                                         | 62            |
|                                   | Kumatakenin                                                                                          | 62            |
|                                   | Licoricone                                                                                           | 62            |
|                                   | Isolicoflavonol                                                                                      | 32            |

|                                                                                                         |                                                                     |              |
|---------------------------------------------------------------------------------------------------------|---------------------------------------------------------------------|--------------|
|                                                                                                         | Astragulin                                                          | 15           |
|                                                                                                         | Kumatakenin                                                         | 63           |
| Flavones                                                                                                | 4',7-Dihydroxyflavone                                               | 32           |
|                                                                                                         | Kaempferol 3-O-methyl ether                                         | 33           |
|                                                                                                         | Saponaretin (isovitexin)                                            | 51           |
|                                                                                                         | Glabranin                                                           | 51           |
|                                                                                                         | Genkwanin                                                           | 15,51        |
|                                                                                                         | Quercetin-3,3'-dimethylether                                        | 15           |
|                                                                                                         | Quercetin-3-glucobioside                                            | 15           |
|                                                                                                         | 5,8-Dihydroxy-flavone-7-O-beta-D-glucuronide (glychionide A)        | 64           |
|                                                                                                         | 5-Hydroxy-8-methoxyl-flavone-7-O-beta-D-glucuronide (glychionide B) | 64           |
|                                                                                                         | Licoflavanone A                                                     | 29           |
|                                                                                                         | Isoviolanthin                                                       | 5            |
|                                                                                                         | Luteolin                                                            | 65           |
|                                                                                                         | Apigenin                                                            | 65           |
|                                                                                                         | Flavanones                                                          | Glabrol      |
| Liquiritin                                                                                              |                                                                     | 5,40,66, 67  |
| 3',6- and 3',8-Diprenylated dalbergioidin (2',4',5,7-tetrahydroxy-isoflavanone)                         |                                                                     | 34           |
| Isoliquiritoside                                                                                        |                                                                     | 15           |
| 3-Hydroxygrabrol                                                                                        |                                                                     | 52           |
| Shinflavanone                                                                                           |                                                                     | 29,52        |
| [6'',6''-Dimethylpyrano(2'',3'':7,8)]-[6''',6'''-dimethylpyrano(2''',3''':4',3')]-flavanone (xambioona) |                                                                     | 29,52        |
| (2R,3R)-3,4',7-Trihydroxy-3'-prenylflavanone                                                            |                                                                     | 29           |
| Liquiritigenin                                                                                          |                                                                     | 3,4,56,57,68 |
| Choerospondin                                                                                           |                                                                     | 5            |
| Licorice glycoside D2/D1                                                                                |                                                                     | 5            |
| 5,7-Dihydroxyflavanone                                                                                  |                                                                     | 5            |
| 3-Hydroxygrabrol                                                                                        |                                                                     | 5            |
| Rhamnoliquiritin                                                                                        |                                                                     | 5            |
| Pinocembrin                                                                                             | 67                                                                  |              |
| 3-Hydroxypyranoflavones                                                                                 | Kanzonol Z                                                          | 47           |
| Flavonoid glycosides                                                                                    | Neoliquiritin                                                       | 51           |
|                                                                                                         | Violanthin                                                          | 40           |
|                                                                                                         | Isoschaftoside                                                      | 40           |
|                                                                                                         | Schaftoside                                                         | 17,40        |
|                                                                                                         | Liquiritin apioside                                                 | 5            |
| Phenylpropanolds                                                                                        | Sinapinic acid                                                      | 65,68        |
|                                                                                                         | Ferulic acid                                                        | 23,65,68     |
|                                                                                                         | Phenylpropionic acid                                                | 69           |
|                                                                                                         | Eugenol                                                             | 20,22        |
|                                                                                                         | Caffeic acid                                                        | 65           |
| Coumarins                                                                                               | Herniarin                                                           | 68           |
|                                                                                                         | Umbelliferon                                                        | 68           |
|                                                                                                         | Liqcoumarin                                                         | 70           |
|                                                                                                         | Glabrocoumarin                                                      | 29,37        |
|                                                                                                         | Glycocoumarin                                                       | 63           |
|                                                                                                         | Licofuranocoumarin                                                  | 63           |
| 3-Arylcoumarins                                                                                         | Glycyrin                                                            | 71           |
|                                                                                                         | Glycycoumarin                                                       | 32,61        |
|                                                                                                         | Licoarylcoumarin                                                    | 33           |
|                                                                                                         | Licopyranocoumarin                                                  | 33           |
| Pyrano-3-arylcoumarin                                                                                   | Kanzonol W                                                          | 29,35        |
| Coumestan                                                                                               | Glycyrol                                                            | 9,60,62      |

|                                                               |                                                               |          |
|---------------------------------------------------------------|---------------------------------------------------------------|----------|
| derivatives                                                   | 5-O-Methylglycyrol                                            | 9        |
|                                                               | Isoglycyrol                                                   | 9,60     |
| Phenolic compounds                                            | Mulberrofuran K                                               | 17       |
| Diarylheptanoid                                               | Kuwanon V                                                     | 17       |
| Benzophenone                                                  | Cudranone                                                     | 17       |
| Diels-Alder types adducts                                     | Guangsangon F                                                 | 17       |
| Carboxylic acids                                              | Benzoic acid                                                  | 69       |
|                                                               | <i>p</i> -Ethoxybenzoic acid                                  | 69       |
|                                                               | Gentisic acid                                                 | 65       |
|                                                               | <i>p</i> -Coumaric acid                                       | 65       |
| Phenols (essential oil)<br>Acohols and ethers (essential oil) | Guaiacol ( <i>O</i> -methoxyphenol)                           | 22,69    |
|                                                               | Phenol                                                        | 69       |
|                                                               | <i>p</i> -Methoxyphenol                                       | 69       |
|                                                               | 2,4-Dihydroxyacetophenone                                     | 69       |
|                                                               | Ethylphenol                                                   | 69       |
|                                                               | ( <i>O</i> -)Cresol                                           | 69       |
|                                                               | 2-Methylphenol                                                | 22       |
|                                                               | 3-Methyl-6-propylphenol                                       | 22       |
|                                                               | 2-Methyl-5-isopropylphenol                                    | 22       |
|                                                               | <i>p</i> -Vinyl-guaiacol                                      | 20       |
|                                                               | Hexanol                                                       | 22,69    |
|                                                               | 2-Phenylethanol                                               | 69       |
|                                                               | 4-Methyl-1-isopropyl-3-cyclohexen-1-ol ( $\alpha$ -terpineol) | 20,22,69 |
|                                                               | 2,3-Butanediol                                                | 69       |
|                                                               | 1,2-Heptanediol                                               | 69       |
|                                                               | Linalool                                                      | 69       |
|                                                               | Lavandulol                                                    | 69       |
|                                                               | Cymenol                                                       | 69       |
|                                                               | Benzyl alcohol                                                | 69       |
|                                                               | Phenylethyl alcohol                                           | 22,69    |
|                                                               | Dimethylphenethyl alcohol                                     | 69       |
|                                                               | Linalyl oxide                                                 | 69       |
|                                                               | 4-Propenylanisol                                              | 69       |
|                                                               | <i>n</i> -Pentanol                                            | 22       |
|                                                               | 2-Methyl-6-methylen-7-octen-2-ol                              | 22       |
|                                                               | Cumic alcohol                                                 | 22       |
|                                                               | 1-Pentadecanol                                                | 22       |
|                                                               | Lavandulol<tetrahydro->                                       | 20       |
|                                                               | ( <i>E</i> )-Linalool oxide                                   | 20       |
|                                                               | <i>p</i> -Cymen-8-ol                                          | 20       |
|                                                               | Methyl chavicol                                               | 20       |
|                                                               | $\alpha$ -Cadinol                                             | 21       |
| Aldehydes (essential oil)                                     | Tiglaldehyde (tentative)                                      | 69       |
|                                                               | Benzaldehyde                                                  | 69       |
|                                                               | 2-Hexanal                                                     | 22       |
|                                                               | Myrtenal                                                      | 22       |
|                                                               | Phenylacetaldehyde                                            | 22       |
|                                                               | 7-Methoxy-3,7-dimethyl-octanal                                | 22       |
|                                                               | 2-Hydroxy-4-methyl benzaldehyde                               | 22       |
|                                                               | Cumin aldehyde                                                | 20       |
|                                                               | ( <i>E</i> )-Cinnamaldehyde                                   | 20       |
|                                                               | (4 <i>E</i> )-Decenal                                         | 20       |
|                                                               | Benzaldehyde                                                  | 21       |
|                                                               | Caproaldehyde                                                 | 21       |
|                                                               | Nonanal                                                       | 21       |
| Ketones and                                                   | 1-Butanol-2-one (tentative)                                   | 69       |

|                                                      |                                         |                                  |          |
|------------------------------------------------------|-----------------------------------------|----------------------------------|----------|
| hydroxy ketones<br>(essential oil)                   | 1-Butanol-3-one                         | 69                               |          |
|                                                      | Acetoin (tentative)                     | 69                               |          |
|                                                      | 2-Hydroxy-3-methyl-2-cyclopenten-1-one  | 69                               |          |
|                                                      | 4-Hydroxy-4-methyl-2-pentanone          | 69                               |          |
|                                                      | Acetol                                  | 69                               |          |
|                                                      | Methyl ethyl ketone                     | 69                               |          |
|                                                      | Fenchone                                | 69                               |          |
|                                                      | Thujone                                 | 69                               |          |
|                                                      | 6-Methyl-5-hepten-2-one                 | 22                               |          |
|                                                      | 3-Methyl-3-hepten-2-one                 | 22                               |          |
|                                                      | 3,5-Octadien-2-one                      | 22                               |          |
|                                                      | 6-Methyl 3,5-heptadien-2-one            | 22                               |          |
|                                                      | Acetophenone                            | 22                               |          |
|                                                      | n-Methyl-2-pyrrolidone                  | 22                               |          |
|                                                      | 2-Methyl-5-isopropyl-2-cyclohexen-1-one | 22                               |          |
|                                                      | Pseudoionone                            | 22                               |          |
|                                                      | 5-Pentylpyran-2-one                     | 22                               |          |
|                                                      | 2-Methyl-3-decen-5-one                  | 22                               |          |
|                                                      | Carvone                                 | 20                               |          |
|                                                      | Piperitone                              | 20                               |          |
|                                                      | Geranylacetone                          | 21                               |          |
|                                                      | 6,10,14-Trimethyl-2-pentadecanone       | 21                               |          |
|                                                      | Esters (essential oil)                  | Ethyl palmitate                  | 69       |
|                                                      |                                         | Ethyl linoleate                  | 69       |
|                                                      |                                         | Ethyl linolenate                 | 69       |
|                                                      |                                         | Ethyl phenylacetate              | 69       |
|                                                      |                                         | Butyl phthalate                  | 69       |
|                                                      |                                         | Butyric anhydride (tentative)    | 69       |
|                                                      |                                         | Butyrolactone                    | 69       |
|                                                      |                                         | $\gamma$ -Hexalactone            | 69       |
|                                                      |                                         | $\gamma$ -Heptalactone           | 69       |
|                                                      |                                         | $\gamma$ -Nonalactone            | 20,22,69 |
|                                                      |                                         | $\gamma$ -Octalactone            | 69       |
|                                                      |                                         | Propyl <i>p</i> -hydroxybenzoate | 69       |
|                                                      |                                         | Methyl hexanoate                 | 22       |
|                                                      |                                         | Hexyl formate                    | 22       |
|                                                      |                                         | Isobutyl adipate                 | 22       |
|                                                      |                                         | Methyl hexadecanoate             | 22       |
|                                                      |                                         | Hexadecyl acetate                | 22       |
| Hexadecanoic acid, ethyl ester                       |                                         | 72                               |          |
| Linoleic acid ethyl ester                            |                                         | 72                               |          |
| <i>E</i> -8-Methyl-9-tetradecen-1-ol acetate         |                                         | 72                               |          |
| 9,12,15-Octadecatrienoic acid, ethyl ester, (Z,Z,Z)- |                                         | 72                               |          |
| $\gamma$ -Lactones (C6–C14)                          |                                         | 72                               |          |
| 4-Methyl- $\gamma$ -lactones                         |                                         | 72                               |          |
| 4-Ethyl- $\gamma$ -lactones                          | 72                                      |                                  |          |
| Methyl 11-cyclopentylundecanoate                     | 21                                      |                                  |          |
| Hydrocarbons<br>(essential oil)                      | <i>p</i> -Cymene                        | 69                               |          |
|                                                      | 4-Propenyltoluene                       | 69                               |          |
|                                                      | 6-Methyl-3-undecene                     | 22                               |          |
|                                                      | 5-Methyl-2-undecene                     | 22                               |          |
|                                                      | 9-Methyl-3-undecene                     | 22                               |          |
|                                                      | 1-Docosene                              | 72                               |          |
|                                                      | 1-Hexadecene                            | 72                               |          |
|                                                      | 1-Octadecene                            | 72                               |          |
|                                                      | Undecane,4-cyclohexyl-                  | 72                               |          |
|                                                      | 5-Acetoxyundecane                       | 72                               |          |
|                                                      | 4-Methyloctane                          | 21                               |          |

|                                    |                                     |                                                           |       |
|------------------------------------|-------------------------------------|-----------------------------------------------------------|-------|
|                                    |                                     | 2,3-Dimethyl-dodecane                                     | 21    |
| Aromatic compounds (essential oil) |                                     | Carvacrol                                                 | 69    |
|                                    |                                     | Thymol                                                    | 69    |
|                                    |                                     | Estragole (methyl cavicol)                                | 22    |
|                                    |                                     | Anethole                                                  | 22    |
|                                    |                                     | Styrene                                                   | 21    |
|                                    |                                     | 2-Pentylfuran                                             | 21    |
|                                    |                                     | 2,2'-Methylenebis(6-tert-butyl-4-methylphenol)            | 21    |
|                                    |                                     | (E)-Anethole                                              | 20    |
|                                    |                                     | Thymol                                                    | 20    |
|                                    |                                     | Carvacrol                                                 | 20    |
| Furan derivatives (essential oil)  |                                     | Furfural                                                  | 22,69 |
|                                    |                                     | Furfuryl alcohol                                          | 69    |
|                                    |                                     | 5-Methyl-3-hydrofuran-2-one                               | 69    |
|                                    |                                     | 2-Methyl-2-tetrahydrofuran-3-one                          | 69    |
|                                    |                                     | 2-Acetylfuran                                             | 69    |
|                                    |                                     | 5-Methylfurfural                                          | 20,69 |
|                                    |                                     | Dihydrobenzofuran                                         | 69    |
|                                    |                                     | 2-Acetyl- 5-methylfuran                                   | 69    |
|                                    |                                     | 1-(2-Furyl)-2-propan one (tentative)                      | 69    |
|                                    |                                     | Furyl ethyl ketone                                        | 69    |
|                                    |                                     | 1-(5-Methyl-2-furyl) 1,2-Propanedione                     | 69    |
|                                    |                                     | Furfuryl formate                                          | 69    |
|                                    |                                     | Furfuryl acetate                                          | 69    |
|                                    |                                     | Furfuryl propionate                                       | 69    |
|                                    |                                     | Furfuryl butyrate                                         | 69    |
|                                    |                                     | 2,2-Difurylme thane                                       | 69    |
|                                    |                                     | 2,2-Difurylethane (tentative)                             | 69    |
|                                    |                                     | 2,2-Difurylethylene (tentative)                           | 69    |
|                                    |                                     | Difurfuryl ether                                          | 69    |
|                                    |                                     | 1-Furfuryl-2-formylpyrrole                                | 69    |
|                                    |                                     | 1-Furfuryl-2-acetylpyrrole                                | 69    |
|                                    |                                     | 2,4-Difurfurylfuran (tentative)                           | 69    |
|                                    |                                     | 2-3-Dihydro-4-methyl furan                                | 22    |
|                                    | 2-Pentylfuran                       | 22                                                        |       |
|                                    | 2,3-Dihydro benzofuran              | 22                                                        |       |
|                                    | Dihydro-5,5-dimethyl-2(3H)-furanone | 22                                                        |       |
| Furanones                          |                                     | Coffee furanone (2-methyl-tetrahydrofuran-3-one)          | 51    |
| Heterocycle compounds              |                                     | 2-Acetylpyrrole                                           | 69    |
|                                    |                                     | 1-Methyl-2-formylpyrrole                                  | 69    |
|                                    |                                     | 2-Formyl-5-methylpyrrole                                  | 69    |
|                                    |                                     | Pyrazole (tentative)                                      | 69    |
|                                    |                                     | 2,6-Dimethylpyrazine                                      | 69    |
|                                    |                                     | 2-Ethyl-6-methylpyrazine                                  | 69    |
|                                    |                                     | Trimethylpyrazine                                         | 69    |
|                                    |                                     | Maltol                                                    | 69    |
|                                    |                                     | Furylmethylketone                                         | 69    |
|                                    |                                     | 2-Methyltetrahydrofuran-3-one                             | 69    |
|                                    |                                     | 2-acetylpyrrole                                           | 69    |
|                                    | Indole                              | 22,69                                                     |       |
| Toluenes                           |                                     | 2-Ethyl-1,4-dimethyl benzene                              | 22    |
| Miscellaneous compounds            |                                     | 1-Methoxy-4-isopropyl cyclohexane                         | 22    |
|                                    |                                     | 3-Methoxy-2-methyl propane                                | 22    |
|                                    |                                     | O-Tolunitrile                                             | 22    |
|                                    |                                     | 1-Methoxy-4-isopropyl benzene                             | 22    |
|                                    |                                     | 8,8-Dimethyl-3,4-dihydro-2H,8H-pyrano[2,3-f]-chromon-3-ol | 29    |
|                                    | Methyl eugenol                      | 20                                                        |       |
| Sesquiterpenes                     |                                     | Caryophyllene                                             | 72    |



|         |                                   |                                                                       |                                                                               |             |
|---------|-----------------------------------|-----------------------------------------------------------------------|-------------------------------------------------------------------------------|-------------|
| Leaf    |                                   | D-cadinene                                                            | 21                                                                            |             |
|         |                                   | Caryophyllene oxide                                                   | 21,72                                                                         |             |
|         |                                   | Germacrene D                                                          | 72                                                                            |             |
|         |                                   | Humulene- (VI)                                                        | 72                                                                            |             |
|         | Monoterpenes                      |                                                                       | D-limonene                                                                    | 72          |
|         |                                   |                                                                       | Calacone                                                                      | 21          |
|         | Prenylated dihydrostilbenes       |                                                                       | $\alpha,\alpha'$ -Dihydro-3,5,4'-trihydroxy-4,5'-diisopentenylstilbene        | 74          |
|         |                                   |                                                                       | $\alpha,\alpha'$ -Dihydro-3,5,3',4'-tetrahydroxy-4,5'-diisopentenylstilbene   | 74          |
|         |                                   |                                                                       | $\alpha,\alpha'$ -Dihydro-3,5,4'-trihydroxy-5'-isopentenylstilbene            | 74          |
|         |                                   |                                                                       | $\alpha,\alpha'$ -Dihydro-3,5,3'-trihydroxy-4'-methoxy-5'-isopentenylstilbene | 74          |
|         |                                   |                                                                       | $\alpha,\alpha'$ -Dihydro-3,5,3',4'-tetrahydroxy-5'-isopentenyl stilbene      | 74          |
|         |                                   |                                                                       | Dihydro-3,5-dihydroxy-4'-acetoxy-5'-isopentenylstilbene                       | 75          |
|         |                                   |                                                                       | Dihydro-3,3',4'-trihydroxy-5-o-isopentenyl-6-isopentenylstilbene              | 75          |
|         |                                   |                                                                       | Dihydro-3,5,3'-trihydroxy-4'-methoxystilbene                                  | 75          |
|         |                                   | Dihydro-3,3'-dihydroxy-5beta-d-o-glucopyranosyloxy-4'-methoxystilbene | 75                                                                            |             |
|         | Isoflavones                       |                                                                       | Formononetin                                                                  | 4,25        |
|         |                                   |                                                                       | Wighteone                                                                     | 74,76       |
|         |                                   |                                                                       | Genistein                                                                     | 76          |
|         |                                   |                                                                       | Lupiwighteone                                                                 | 75,76       |
|         |                                   |                                                                       | Prunetin                                                                      | 76          |
|         | Flavonones                        |                                                                       | Licoflavanone                                                                 | 25,76       |
|         |                                   |                                                                       | Pinocembrin                                                                   | 25,67,74,76 |
|         |                                   |                                                                       | Naringenin                                                                    | 75          |
|         |                                   |                                                                       | Liquiritin                                                                    | 67          |
|         | Flavonoids                        |                                                                       | Glabranin                                                                     | 67,74       |
|         |                                   |                                                                       | Licoflavone                                                                   | 74          |
|         |                                   |                                                                       | Glabranin isomer                                                              | 75          |
|         |                                   |                                                                       | Pinocembrin 7-O-glucoside                                                     | 75          |
|         |                                   |                                                                       | Astragalin                                                                    | 75          |
|         |                                   |                                                                       | Vicenin II                                                                    | 75          |
|         |                                   |                                                                       | Pinocembrin-7-O- $\beta$ -D-glucopyranoside                                   | 67          |
|         |                                   |                                                                       | Pinobanksin                                                                   | 67          |
|         |                                   | Galangin                                                              | 67                                                                            |             |
|         | Flavonoid glycosides              |                                                                       | Isoquercitrin                                                                 | 25          |
|         | Cyclic polyols                    |                                                                       | Pinitol                                                                       | 75          |
|         | Acohols                           |                                                                       | Benzyl alcohol                                                                | 21          |
|         |                                   |                                                                       | Nerolidol                                                                     | 21          |
|         |                                   |                                                                       | $\alpha$ -Cadinol                                                             | 21          |
|         |                                   |                                                                       | Phytol                                                                        | 21          |
|         | Aldehydes                         |                                                                       | Tetradecanal                                                                  | 72          |
|         |                                   |                                                                       | Nonanal                                                                       | 72          |
|         |                                   |                                                                       | 3-Methyl-2-butenal                                                            | 21          |
|         |                                   | Trans-2-hexenal                                                       | 21                                                                            |             |
|         |                                   | Benzaldehyde                                                          | 21                                                                            |             |
|         |                                   | 2-Phenylethanal                                                       | 21                                                                            |             |
| Ketones |                                   | 6-Prenylnaringenin                                                    | 76                                                                            |             |
|         |                                   | 2-Undecanone, 6,10-dimethyl-                                          | 72                                                                            |             |
|         |                                   | 2-Pentadecanone, 6,10,14-trimethyl-                                   | 72                                                                            |             |
|         |                                   | 7,8-Epoxy-2-ionone                                                    | 72                                                                            |             |
|         |                                   | Benzylacetone                                                         | 21                                                                            |             |
|         |                                   | 1- Divinyl-ethanone                                                   | 21                                                                            |             |
|         |                                   | Beta-damarone                                                         | 21                                                                            |             |
|         |                                   | Geranylacetone                                                        | 21                                                                            |             |
|         |                                   | $\beta$ -Ionone                                                       | 21                                                                            |             |
|         |                                   | 4-[2,2,6-Trimethyl-7-oxabicyclo[4.1.0]hept-1-yl]-3-buten-2-one        | 21                                                                            |             |
|         | 6,10,14-Trimethyl-2-pentadecanone | 21                                                                    |                                                                               |             |

|                         |                                                                                    |    |
|-------------------------|------------------------------------------------------------------------------------|----|
| Esters                  | Dibutyl phthalate                                                                  | 72 |
|                         | Dihydroactinidiolide                                                               | 21 |
|                         | Benzyl benzoate                                                                    | 21 |
|                         | 1,6-2 Benzoate                                                                     | 21 |
| Aromatic compounds      | Benzocyclobutene                                                                   | 21 |
| Phenols                 | 2,2'-Methylenebis(6-tert-butyl-4-methylphenol)                                     | 21 |
| Acids                   | Pheracetic acid, 2,5 $\alpha$ , $\alpha$ -tetramethyl-                             | 72 |
|                         | Phthalic acid                                                                      | 21 |
| Alkanes                 | Pentane, 2-methyl-                                                                 | 72 |
|                         | Pentane, 3-methyl-                                                                 | 72 |
|                         | Pentane, 2,2-dimethyl-                                                             | 72 |
|                         | Cyclopentane, methyl-                                                              | 72 |
|                         | Pentane, 3,3-dimethyl-                                                             | 72 |
|                         | Hexane, 2-methyl-                                                                  | 72 |
|                         | Pentane, 2,3-dimethyl-                                                             | 72 |
|                         | Hexane, 3-methyl-                                                                  | 72 |
|                         | Pentane, 3-ethyl-                                                                  | 72 |
|                         | Cyclopentane, 1,2-dimethyl-                                                        | 72 |
|                         | Pentane, 2,2,4-trimethyl-                                                          | 72 |
|                         | Cyclohexane, methyl-                                                               | 72 |
|                         | Hexane, 2,4-dimethyl-                                                              | 72 |
|                         | Hexane, 3,3-dimethyl-                                                              | 72 |
|                         | Cyclopentane, 1,2,3-trimethyl-                                                     | 72 |
|                         | Pentane, 2,3,3-trimethyl-                                                          | 72 |
|                         | Hexane, 2,3-dimethyl-                                                              | 72 |
|                         | Heptane, 2-methyl-                                                                 | 72 |
|                         | Hexane, 3,3,4-trimethyl-                                                           | 72 |
|                         | Hexane, 3,4-dimethyl-                                                              | 72 |
|                         | Heptane, 3-methyl-                                                                 | 72 |
|                         | Hexane, 3-ethyl-                                                                   | 72 |
|                         | Cyclohexane, 1,3-dimethyl-, trans-                                                 | 72 |
|                         | Hexane, 2,2,4-trimethyl-                                                           | 72 |
|                         | Cyclohexane, 1,1-dimethyl-                                                         | 72 |
|                         | Cyclopentane, 1-ethyl-3-methyl-                                                    | 72 |
|                         | Cyclopentane, 1-ethyl-2-methyl-                                                    | 72 |
|                         | Cyclopentane, 1-ethyl-1-methyl-                                                    | 72 |
|                         | Cyclopentane, 1,2-dimethyl-, trans-                                                | 72 |
|                         | Octane, 2-chloro-                                                                  | 72 |
|                         | Cyclohexane, 1,4-dimethyl-, cis-                                                   | 72 |
|                         | Cyclopentane, (1-methylethyl-)                                                     | 72 |
|                         | Hexane, 2,3,5-trimethyl-                                                           | 72 |
|                         | Hexane, 2,2,5-trimethyl-                                                           | 72 |
|                         | Heptane, 2,4-dimethyl                                                              | 72 |
|                         | Pentane, 3-methyl-3-ethyl-                                                         | 72 |
|                         | Heptane, 2,6-dimethyl                                                              | 72 |
|                         | Cyclohexane, ethyl-                                                                | 72 |
|                         | Heptane, 2,5-dimethyl-                                                             | 72 |
|                         | Hexadecane, 2,6,10,14-tetramethyl                                                  | 72 |
|                         | Nonadecane, 9-methyl-                                                              | 72 |
|                         | Hexadecane, 2,6,10,14-tetramethyl-                                                 | 72 |
| Hydrocarbons            | 4-Methyloctane                                                                     | 21 |
|                         | Ethylbenzene                                                                       | 72 |
|                         | <i>p</i> -Xylene                                                                   | 72 |
| Miscellaneous compounds | Naphthalene, 1,2,3,4-tetrahydro-1,6-dimethyl-4-(1-methylethyl-)-(1 <i>s-cis</i> -) | 72 |
|                         | <i>N</i> -Phenyl-1-naphthylamine                                                   | 72 |
|                         | Benzene, 1-methoxy-4-(2-propenyl)-                                                 | 72 |
|                         | Benzene, 1-methoxy-4-(1-propenyl)-                                                 | 72 |

|                                     |                                                               |                                   |                           |
|-------------------------------------|---------------------------------------------------------------|-----------------------------------|---------------------------|
| Seed                                | Flavonoid glycosides                                          | Isoquercitrin                     | 25                        |
| Stem                                | Flavonones                                                    | Pinocembrin                       | 25                        |
|                                     |                                                               | Licoflavanone                     | 25                        |
| Stolon                              | Flavanones                                                    | 3-Hydroxyglabrol                  | 35                        |
| Root and stolon                     | Flavanones                                                    | 3-Hydroxyglabrol                  | 35                        |
|                                     | Triterpenes                                                   | Glycyrrhizic acid                 | 77,78                     |
|                                     |                                                               | Glisoflavone                      | 33                        |
|                                     | Isoflavones                                                   | Formononetin                      | 79                        |
|                                     |                                                               | Glabridin                         | 79                        |
|                                     |                                                               | Hispaglabridin B                  | 79                        |
|                                     | Isoflavans                                                    | 4'-O-Methylglabridin              | 79                        |
|                                     |                                                               | Isoliquiritigenin                 | 77-79                     |
|                                     | Chalcones                                                     | Kanzonol Y                        | 35                        |
|                                     |                                                               | Chalcone derivatives              | 1,2-Dihydroparatocarpin A |
|                                     | Flavones                                                      | Kaempferol 3-O-methyl ether       | 33                        |
|                                     | 3-Arylcoumarins                                               | Licoarylcoumarin                  | 33                        |
|                                     |                                                               | Licopyranocoumarin                | 33                        |
|                                     | 2-Arylcoumarins                                               | Licocoumarone                     | 33                        |
|                                     | Neolignan lipid esters                                        | Mixture of neolignan lipid esters | 79                        |
| Phenolic compounds                  | Hemileiocarpin                                                | 79                                |                           |
|                                     | Paratocarpin B                                                | 79                                |                           |
| Root and rhizome                    | Triterpenes                                                   | Glycyrrhetic acid                 | 80,81                     |
|                                     |                                                               | Glycyrrhizic acid                 | 81,82                     |
|                                     |                                                               | Uralsaponin B                     | 82                        |
|                                     | Isoflavones                                                   | Glabrene                          | 83                        |
|                                     |                                                               | Calycosin                         | 54                        |
|                                     |                                                               | Shinpterocarpin                   | 45                        |
|                                     |                                                               | Derrone                           | 45                        |
|                                     |                                                               | Lupiwighteone                     | 45                        |
|                                     |                                                               | 2,3-Dehydrokievitone              | 45                        |
|                                     |                                                               | Parvisoflavones-A                 | 45                        |
|                                     |                                                               | 1",2"-Dehydrocyclokievitone       | 45                        |
|                                     | 7,2'-Dihydroxy-4'-methoxy-8-(3-methyl-2-butenyl) isoflavanone | 45                                |                           |
|                                     | 3-Hydroxyisoflavones                                          | Glycybridin J                     | 45                        |
|                                     | Isoflavans                                                    | Glabridin                         | 81,83-86                  |
|                                     |                                                               | 3'-Hydroxy-4'-O-methylglabridin   | 45                        |
|                                     |                                                               | 8-Prenyl-phaseollinisoflavan      | 45                        |
|                                     |                                                               | Glycybridin H                     | 45                        |
|                                     | Hydroxyisoflavans                                             | Licoricidin                       | 81                        |
|                                     | Isoflavone glycosides                                         | Ononin                            | 54                        |
|                                     | Isoflavenes                                                   | Glycybridin D                     | 45                        |
| Glycybridin E                       |                                                               | 45                                |                           |
| Isoflavene derivatives              | 3,4-Didehydroglabridin                                        | 45                                |                           |
| Hydroxyisoflavonoids                | Isoglycycomarin                                               | 82                                |                           |
| Chalcones and chalcone derivatives  | Isoliquiritigenin                                             | 57,81,82                          |                           |
|                                     | Isoliquiritin                                                 | 54,57,82                          |                           |
|                                     | Licochalcone A                                                | 45,81,82                          |                           |
|                                     | Licuroside (neoisoliquiritin apioside)                        | 87,88                             |                           |
|                                     | Isoliquiritin                                                 | 81,87                             |                           |
|                                     | 2-(5-p-Coumaryl apiosyl), isoliquiritin                       | 87                                |                           |
| Licuraside (isoliquiritin apioside) | 54,81,88                                                      |                                   |                           |

|              |                                        |                                                                                                         |                |
|--------------|----------------------------------------|---------------------------------------------------------------------------------------------------------|----------------|
|              |                                        | Kanzonol Y                                                                                              | 45             |
|              |                                        | [6'',6''-Dimethylpyrano(2'',3'':4,5)]-3'- $\gamma$ , $\gamma$ -dimethylallyl-2',3,4'-trihydroxychalcone | 45             |
|              |                                        | Licoagrochalcone A                                                                                      | 45             |
|              |                                        | Isobavachalcone                                                                                         | 45             |
|              |                                        | Kanzonol B                                                                                              | 45             |
|              |                                        | Paratocarpin B                                                                                          | 45             |
|              | $\alpha$ -Hydroxydihydrochalcones      | Glycybridin A                                                                                           | 45             |
|              |                                        | Glycybridin B                                                                                           | 45             |
|              |                                        | Glycybridin C                                                                                           | 45             |
|              | Chalcone oligoglycosides               | Isoliquiritin apioside                                                                                  | 81,87          |
|              | Flavonoids                             | Apigenin-6,8-di-C-glucoside (vicenin-2)                                                                 | 88             |
|              |                                        | Apigenin 2''-O-pentosyl-6-C-hexoside                                                                    | 88             |
|              |                                        | Methylapigenin O-hexoside                                                                               | 88             |
|              |                                        | Liquiritigenin apiosyl-glucoside isomers                                                                | 88             |
|              |                                        | Naringenin-7-O-aposyl-glucoside                                                                         | 88             |
|              |                                        | Euchrenone as                                                                                           | 45             |
|              |                                        | Abyssinone II                                                                                           | 45             |
|              |                                        | Kanzonol C                                                                                              | 45             |
|              | Flvonols                               | (2 <i>R</i> ,3 <i>R</i> )-3,4',7-Trihydroxy-3'-prenylflavane                                            | 45             |
|              | Flavones                               | Apigenin                                                                                                | 80             |
|              | Flavone glucosides                     | Vitexin                                                                                                 | 89             |
|              | Flavanones                             | Liquiritin                                                                                              | 54,57, 81,82   |
|              |                                        | Liquiritigenin                                                                                          | 54,57,81,82,87 |
|              |                                        | Naringenin                                                                                              | 45             |
|              |                                        | Xambioona                                                                                               | 45             |
|              |                                        | Shinflavanone                                                                                           | 45             |
|              |                                        | 3-Hydroxyglabrol                                                                                        | 45             |
|              | Monohydroxyflavanones                  | (2 <i>S</i> )-Abyssinone 1                                                                              | 45             |
|              | 3-Hydroxypyranoflavonones              | Kanzonol Z                                                                                              | 45             |
|              | 2-Arylbenzofuran flavonoids            | Glyinflanin H (glabrocoumarone B)                                                                       | 45             |
|              |                                        | Kanzonol U                                                                                              | 45             |
|              | 2-Arylbenzofurans                      | Glycybridin F                                                                                           | 45             |
|              |                                        | Glycybridin G                                                                                           | 45             |
|              | Flavonoid glycosides                   | Liquiritin apioside                                                                                     | 54,81,87       |
|              |                                        | Neoliquiritin apioside                                                                                  | 87             |
|              | 6 $\alpha$ ,11 $\alpha$ -Pterocarpenes | Dehydroglyceollin I                                                                                     | 45             |
|              | Pterocarpan                            | Licoagrocarpin                                                                                          | 45             |
|              |                                        | Phaseollin                                                                                              | 45             |
|              | 3-Phenoxchromone                       | Glycybridin I                                                                                           | 45             |
|              | 3-Arylcoumarin                         | Glycoumarin                                                                                             | 81,82          |
|              |                                        | Glycybridin K                                                                                           | 45             |
|              | Pyrano-3-arylcoumarin                  | Kanzonol W                                                                                              | 45             |
|              | Coumestan derivatives                  | Isoglycyrol                                                                                             | 82             |
|              | Phenolics                              | 2'-O-Demethybidwillol                                                                                   | 45             |
|              |                                        | Erybacin                                                                                                | 45             |
|              | Miscellaneous compounds                | <i>p</i> -Hydroxybenzylmalonic acid                                                                     | 81             |
|              |                                        | Glycyrrhizic acid monoammonium salt                                                                     | 54             |
| Root culture | Triterpenes                            | Betulinic acid                                                                                          | 90             |
|              |                                        | $\beta$ -Amyrin                                                                                         | 90             |

|                      |                                    |                             |    |
|----------------------|------------------------------------|-----------------------------|----|
|                      |                                    | Lupeol                      | 90 |
| Hairy root culture   | Sesquiterpene lactones             | Odoratin                    | 91 |
|                      | Isoflavones                        | Afrormosin                  | 91 |
|                      | Isoflavans                         | 4'-O-Methylglabridin        | 92 |
|                      | Dipyranoisoflavans                 | Glyinflanin K               | 92 |
|                      | Chalcones and chalcone derivatives | Echinatin                   | 91 |
|                      |                                    | Kanzonol B                  | 93 |
|                      |                                    | 4-HydroxyLonchocarpin       | 93 |
|                      | Flavanones                         | Glabrol                     | 93 |
|                      |                                    | Xambioona                   | 93 |
|                      |                                    | 3-Hydroxyglabrol            | 93 |
|                      | Flavonoids                         | Isobavachalcone             | 93 |
|                      |                                    | Euchrenone as               | 93 |
|                      |                                    | Abssinone II                | 93 |
|                      |                                    | Kanzonol D                  | 91 |
|                      | Prenylated bioflavone              | Licoagrone                  | 91 |
|                      | Prenylated flavonoids              | Licoagrochalcone A          | 93 |
|                      |                                    | Licoagrocarpin              | 93 |
| Glabridin            |                                    | 92                          |    |
| Tenuifolin B         |                                    | 92                          |    |
| Lespedezaflavanone B |                                    | 92                          |    |
| Coumestans           | Phaseol                            | 91                          |    |
| Others               | Licoagrodione                      | 92                          |    |
| Whole plant          | Isoflavone                         | Genistein                   | 94 |
|                      | Chalcones                          | Echinatin                   | 94 |
|                      | Flavanones                         | Liquirtigenin               | 95 |
|                      | Flavonoids                         | 6-Aldehydo-isoophiopogonone | 95 |
|                      | 3-Arylcoumarins                    | Licopyranocoumarin          | 94 |
|                      | Polyphenols                        | Ellagic acid                | 95 |
|                      | Phenolic compounds                 | Glicoricone                 | 94 |
| Licofuranone         |                                    | 94                          |    |

Table S2. Secondary metabolites in *Paeonia lactiflora*.

| Part              | Class                  | PSM                                              | References            |
|-------------------|------------------------|--------------------------------------------------|-----------------------|
| Root              | Monoterpene glycosides | 6-O-β-D-Glucopyranosyl-lactinolide               | 96                    |
|                   |                        | Oxybenzoyl-paeoniflorin                          | 96,97                 |
|                   |                        | Albiflorin R1                                    | 98                    |
|                   |                        | Paeoniflorin                                     | 97,99-110             |
|                   |                        | Albiflorin (pinnae-type monoterpenes)            | 97,99-102,104-110     |
|                   |                        | Benzoylpaeoniflorin                              | 97,99,101,104,108-110 |
|                   |                        | Oxypaeoniflorin/oxypaeoniflorin isomer           | 97,110                |
|                   |                        | Lactiflorin                                      | 97,108,110            |
|                   |                        | 3-O-Methylpaeoniflorin                           | 97                    |
|                   |                        | Mudanpioside J                                   | 97                    |
|                   |                        | Paeoniflorin sulfonate                           | 99                    |
|                   |                        | 6'-O-β-D-Glucopyranosylalbiflorin                | 100                   |
|                   |                        | 6'-O-Benzoylalbiflorin                           | 100                   |
|                   |                        | Benzoyl paeoniflorin                             | 100,107               |
|                   |                        | Isopaeoniflorin                                  | 111                   |
|                   |                        | Isobenzoylpaeoniflorin                           | 111                   |
|                   |                        | 4-O-Methyl-paeoniflorin                          | 108,111               |
|                   |                        | 1-O-β-D-Glucopyranosyl-8-O-benzoylpaeonisuffrone | 112                   |
|                   |                        | Paeonidanin                                      | 104,112               |
|                   |                        | Paeonilactone-B                                  | 101                   |
| Paeonilactone-C   | 101                    |                                                  |                       |
| Paeoniflorigenone | 101,105                |                                                  |                       |

|              |                                               |                 |
|--------------|-----------------------------------------------|-----------------|
|              | Oxypaeoniflorin                               | 101,108         |
|              | 4'-O-Benzoylpaeoniflorin                      | 113,114         |
|              | 4-O-Galloylbiflorin                           | 103,105,113,114 |
|              | Paeonin A                                     | 115             |
|              | Paeonin B                                     | 115             |
|              | Paeonin C                                     | 115             |
|              | 8-Debenzoylpaeonidanin                        | 115             |
|              | Galloylbiflorin                               | 103,104         |
|              | Lalbiflorin                                   | 103             |
|              | Galloy paeoniflorin                           | 103             |
|              | 6-O-Galloyl- $\beta$ -D-glucopyraneose        | 103             |
|              | 4-Methylpaeoniflorin                          | 104             |
|              | Paeonidanin A                                 | 104             |
|              | Benzoylbiflorin                               | 104             |
|              | Debenzoylbiflorin                             | 104             |
|              | 2'-O-Benzoylpaeoniflorin                      | 116             |
|              | Albiflorin R2                                 | 116             |
|              | Albiflorin R3                                 | 116             |
|              | Nor-paeonilactone                             | 105             |
|              | Paeonilactone D                               | 105             |
|              | Paeonilactone A                               | 105             |
|              | 9-Hydroxypaeonilactone A                      | 105             |
|              | Paeonin D                                     | 105             |
|              | 6'-O-Galloylbiflorin                          | 105             |
|              | Galloylpaeoniflorin                           | 105,108         |
|              | Paeonidanin F                                 | 117             |
|              | Paeonidanin G                                 | 117             |
|              | Paeonidanin H                                 | 117             |
|              | Desbenzoylpaeoniflorin                        | 110             |
|              | Pinen-vicianoside                             | 110             |
|              | Hydroxypaeoniflorin                           | 107             |
|              | 8-Debenzoylpaeoniflorin                       | 118             |
|              | Paeonidanin B                                 | 118             |
|              | Paeonidanin C                                 | 118             |
|              | Paeonidanin D                                 | 118             |
|              | Paeonidanin E                                 | 108             |
|              | Oxypaeoniflora                                | 109             |
| Monoterpenes | 1-O- $\beta$ -D-Glucopyranosylpaeonisuffrone  | 96,112          |
|              | Lactinolide                                   | 96              |
|              | Paeonilactinone                               | 96              |
|              | 4-Methylbenzoylpaeoniflorin                   | 104             |
|              | Paeoniphenoside                               | 104             |
|              | Paeonisuffrone C                              | 105             |
|              | Paeonisuffrone                                | 105             |
|              | 6'-O-Acetylpaeoniflorin                       | 106             |
|              | Galloyl-desbenzoylpaeoniflorin                | 110             |
|              | Galloylpaeoniflorin/galloylbiflroin           | 110             |
|              | Isomaltopaeoniflorin/glucopyranosylalbiflorin | 110             |
|              | Glucopyranosyl-enzoylpaeonisuffrone           | 110             |
|              | Di-O-galloylpaeoniflorin                      | 110             |
|              | Pyrethrin I                                   | 118             |
|              | Pyrethrin II                                  | 118             |
|              | Paeoniflorol                                  | 108             |
|              | 4'-Hydroxypaeoniflorigenone                   | 108             |
|              | 4- <i>epi</i> -Albiflorin                     | 108             |
|              | Paeonivayin                                   | 108             |
|              | Salicylpaeoniflorin                           | 108             |
|              | Mudanpioside C                                | 108             |

|                                         |                                                                                         |                     |
|-----------------------------------------|-----------------------------------------------------------------------------------------|---------------------|
|                                         | Mudanpioside J                                                                          | 108                 |
|                                         | Benzoyloxypaeoniflorin                                                                  | 108                 |
|                                         | 6'-O-Vanillyloxypaeoniflorin                                                            | 108                 |
|                                         | Paeonenoide D                                                                           | 119                 |
|                                         | Paeonenoide E                                                                           | 119                 |
| Triterpenes                             | $\beta$ -Sitosterol                                                                     | 103,120             |
|                                         | Palbinone                                                                               | 105                 |
|                                         | Oleanic acid                                                                            | 107,119             |
|                                         | 11 $\alpha$ ,12 $\alpha$ -Epoxy-3 $\beta$ ,4 $\beta$ -dihydroxy-24-norolean-28-oic acid | 119                 |
|                                         | 3 $\beta$ ,4 $\beta$ ,23,29-Tetrahydroxy-24-norolean-12-en-28-oic acid                  | 119                 |
|                                         | Paeonenoide A (24,30-dinortriterpenoid)                                                 | 119                 |
|                                         | 11 $\alpha$ ,12 $\alpha$ -Epoxy-3 $\beta$ ,23-dihydroxyolean-28,13 $\beta$ -olide       | 119                 |
|                                         | 11 $\alpha$ ,12 $\alpha$ -Epoxy-3 $\beta$ -hydroxyolean-28,13 $\beta$ -olide            | 119                 |
| Hederagenin                             | 119                                                                                     |                     |
| Phytosterols                            | Daucosterol ( $\beta$ -sitosterol glucoside)                                            | 118                 |
| Phenolic acids                          | (+)-Catechin-7-O-gallate                                                                | 108                 |
|                                         | (-)-Epicatechin-7-O-gallate                                                             | 108                 |
| Phenolic glycosides                     | 2-Methoxy-5-(E)-propenyl-phenol- $\beta$ -vicianoside                                   | 122                 |
| Phenolic aldehydes                      | Paeonalin A                                                                             | 120                 |
| Phenolic compounds                      | Phloroglucinol                                                                          | 123                 |
|                                         | Resorcinol                                                                              | 123                 |
|                                         | Catechol                                                                                | 123                 |
|                                         | Methyl gallate                                                                          | 103,106,108         |
|                                         | Pyrogallol                                                                              | 103                 |
|                                         | 1,2,3-Benzenetriol                                                                      | 104                 |
|                                         | Bisphenol A (diphenylmethane derivatives and bisphenols)                                | 106                 |
| Phenol (carbolic acid)                  | 118                                                                                     |                     |
| Polyhenols                              | 1,2,3,4,6-Pentagalloyl glucose (PGG)                                                    | 99,103,108          |
|                                         | Paeonol                                                                                 | 102,106-108,124     |
|                                         | 3-O-Galloylquinic acid                                                                  | 118                 |
|                                         | 4-O-Galloylquinic acid                                                                  | 118                 |
|                                         | Pedunculagin                                                                            | 118                 |
|                                         | 1,2,3,6-Tetra-O-galloyl- $\beta$ -D-glucose                                             | 118                 |
|                                         | 1,3,6-Trigalloyl- $\beta$ -D-glucose                                                    | 118                 |
|                                         | 1,2,3-Tri-O-galloyl- $\beta$ -D-glucose                                                 | 118                 |
| 1,2,6-Tri-O-galloyl- $\beta$ -D-glucose | 118                                                                                     |                     |
| Hydrolysable tannins                    | Casuarinin                                                                              | 118                 |
|                                         | Casuarictin                                                                             | 118                 |
|                                         | 5-Desgalloylstachyurin                                                                  | 118                 |
|                                         | 1-O-Galloyl- $\beta$ -D-glucose                                                         | 118                 |
|                                         | Strictinin                                                                              | 118                 |
|                                         | Tellimagrandin I                                                                        | 118                 |
|                                         | 2,3-O-(5)-Hexahydroxydiphenoyl-D-glucopyranose                                          | 118                 |
| Gallotannins                            | Pentagalloylglucose                                                                     | 110                 |
|                                         | Hexagalloylglucose                                                                      | 110                 |
|                                         | Heptagalloylglucose                                                                     | 110                 |
|                                         | Octagalloylglucose                                                                      | 110                 |
|                                         | Nonagalloylglucose                                                                      | 110                 |
| Flavonoids                              | (+)-Catechin                                                                            | 102-104,107-109     |
|                                         | 4',5-Dihydroxyflavanone-7-O- $\beta$ -D-glucoside                                       | 104                 |
|                                         | 5,7-Dihydroxyflavanone-4'-O- $\beta$ -D-glucoside                                       | 104                 |
|                                         | Narigenin chalcone 2'-O-xyloside                                                        | 108                 |
|                                         | 4,2',4',6',7,8-Hexahydroxy-7,(8)-dihydro-chalcone, (cilicicone-A)                       | 108                 |
| Prenylated furocoumarins                | Pangelin                                                                                | 125                 |
| Carboxylic                              | Gallic acid                                                                             | 102-104,107-109,124 |

|                         |                         |                                                                                              |                     |             |
|-------------------------|-------------------------|----------------------------------------------------------------------------------------------|---------------------|-------------|
|                         | acids                   | Benzoic acid                                                                                 | 102,106,108,109,120 |             |
|                         |                         | Vanillic acid                                                                                | 104                 |             |
|                         |                         | 3,5-Dihydroxy-4-methoxyl-benzoic acid                                                        | 108                 |             |
|                         | Esters                  | Ethyl gallate                                                                                | 103                 |             |
|                         |                         | Di-(2-ethylhexyl)phthalate                                                                   | 103                 |             |
|                         |                         | 1,2,3,4,6-Penta-O-galloyl- $\beta$ -D-glucopyranose                                          | 106,124             |             |
|                         |                         | Methyl 4-hydroxy-3-methoxybenzoate                                                           | 108                 |             |
|                         | Anthocyanins            | Peonin (peonidin-3,5-diglucoside)                                                            | 118                 |             |
|                         | Miscellaneous compounds | Paeonalin B (volatile crystalline substance)                                                 | 120                 |             |
|                         |                         | Benzoylsucrose                                                                               | 110                 |             |
|                         |                         | Galloylsucrose                                                                               | 110                 |             |
|                         | Flower                  | Monoterpene glycosides                                                                       | Paeoniflorin        | 126,127     |
|                         |                         |                                                                                              | Albiflorin          | 102,126,127 |
|                         |                         |                                                                                              | Oxypaeoniflorin     | 127         |
| Flavonoids              |                         | Pelargonidin 3-glucoside                                                                     | 123                 |             |
|                         |                         | Cyanidin 3,5-diglucoside                                                                     | 123                 |             |
|                         |                         | Peonidin 3-glucoside                                                                         | 123                 |             |
|                         |                         | Peonidin 3,5-di-O- $\beta$ -D-glucopyranoside                                                | 123                 |             |
|                         |                         | Malvoside (petal)                                                                            | 123                 |             |
|                         |                         | Catechin                                                                                     | 102                 |             |
|                         |                         | Quercetin-3-O-glucoside-6"-gallate                                                           | 126                 |             |
|                         |                         | Kaempferol-3-O-glucoside-6"-gallate                                                          | 126                 |             |
|                         |                         | Kaempferol-3,7-di-O- $\beta$ -D-glucoside                                                    | 126                 |             |
|                         |                         | Quercetin-3-O-(6"-O-galloyl)-glucoside                                                       | 128                 |             |
|                         |                         | Quercetin-3-O- $\beta$ -D-glucoside                                                          | 128                 |             |
|                         |                         | Kaempferol-3-O-(6"-O-galloyl)-glucoside                                                      | 128                 |             |
|                         |                         | Isohamnetin-3-O- $\beta$ -D-glucoside                                                        | 128                 |             |
|                         |                         | Kaempferol                                                                                   | 128                 |             |
|                         |                         | Kaempferol-3-O- $\beta$ -D-glucoside                                                         | 128                 |             |
|                         |                         | Kaempferol-7-O- $\beta$ -D-glucoside                                                         | 128                 |             |
|                         |                         | Quercetin-3-O-(6"-O-galloyl)-glucoside                                                       | 127                 |             |
|                         |                         | Kaempferol-3,7-di-O- $\beta$ -D-glucopyranoside                                              | 127                 |             |
|                         |                         | Kaempferol-3-O- $\beta$ -D-glucopyranosyl-7-O- $\alpha$ -L-rhamnopyranoside                  | 127                 |             |
|                         |                         | Kaempferol-3-O- $\beta$ -D-galactopyranosyl-7-O- $\beta$ -D-glucopyranoside                  | 127                 |             |
|                         |                         | Kaempferol 3-O-(6-O-galloyl)- $\beta$ -D-glucopyranoside                                     | 127                 |             |
|                         |                         | Astragalín                                                                                   | 127                 |             |
|                         |                         | 2-Phenylethyl- $[\alpha$ -L-rhamnopyranosyl-(1 $\rightarrow$ 6)]- $\beta$ -D-glucopyranoside | 127                 |             |
| Tannins                 |                         | 1,2,3,6-tetra-O-Galloyl- $\beta$ -D-glucopyranoside                                          | 126,127             |             |
|                         |                         | 1,2,3,4,6-penta-O-Galloyl- $\beta$ -D-glucopyranoside                                        | 126,127             |             |
| Hydrolysable tannins    |                         | 1-O-Galloyl- $\beta$ -D-glucose                                                              | 126                 |             |
| Gallotannins            |                         | 1,2,3,4,6-Pentagalloyl- $\beta$ -D-glucose                                                   | 128                 |             |
| Phenolic compounds      |                         | Phenethyl alcohol                                                                            | 123                 |             |
|                         |                         | Methyl gallate                                                                               | 126,127             |             |
|                         |                         | Ethyl gallate                                                                                | 126,127             |             |
|                         |                         | An equilibrium mixture of methyl <i>m</i> -digallate and methyl <i>p</i> -digallate          | 127                 |             |
|                         |                         | An equilibrium mixture of ethyl <i>m</i> -digallate and ethyl <i>p</i> -digallate            | 127                 |             |
| Carboxylic acids        |                         | Gallic acid                                                                                  | 126,127             |             |
|                         |                         | Vanillic acid                                                                                | 126,127             |             |
| Esters                  |                         | 1-O-Galloyl- $\beta$ -D-glucopyranoside                                                      | 127                 |             |
| Miscellaneous compounds |                         | (Z)-Hex-3-en-1-ol                                                                            | 123                 |             |
|                         |                         | 13-Methyltetradecanoic acid                                                                  | 123                 |             |
|                         |                         | (Z)-Hex-3-enal                                                                               | 123                 |             |
|                         |                         | 1'-O-Galloylsucrose                                                                          | 127                 |             |
|                         |                         | 6'-O-Galloylsucrose                                                                          | 127                 |             |
|                         |                         | 6-O-Galloyl-D-glucopyranoside                                                                | 127                 |             |
|                         |                         | 3-Hydroxycitronellic acid 3-O- $\beta$ -D-glucopyranoside                                    | 127                 |             |
|                         |                         | 2-Phenylethyl- $[\beta$ -D-glucopyranosyl-(1 $\rightarrow$ 6)]- $\beta$ -D-glucopyranoside   | 127                 |             |



|                                                       |                        |                                                                                       |         |
|-------------------------------------------------------|------------------------|---------------------------------------------------------------------------------------|---------|
|                                                       |                        | 2-Phenylethyl- $\beta$ -D-glucopyranoside                                             | 127     |
|                                                       |                        | 3-O- $\beta$ -D-Glucopyranoside                                                       | 127     |
|                                                       |                        | 6-O- <i>m</i> -Digalloyl-1,2,3,4- <i>tetra</i> -O-galloyl- $\beta$ -D-glucopyranoside | 127     |
| Leaf                                                  | Monoterpene glycosides | Albiflorin                                                                            | 102     |
|                                                       |                        | Paeoniflorin                                                                          | 102     |
|                                                       | Flavonoids             | Catechin                                                                              | 102     |
|                                                       | Carboxylic acids       | Gallic acid                                                                           | 102     |
|                                                       |                        | Benzoic acid                                                                          | 102     |
| Phenolic compounds                                    | Paeonol                | 102                                                                                   |         |
| Stem                                                  | Monoterpene glycosides | Albiflorin                                                                            | 102     |
|                                                       |                        | Paeoniflorin                                                                          | 102     |
|                                                       | Flavonoids             | Catechin                                                                              | 102     |
|                                                       | Carboxylic acids       | Gallic acid                                                                           | 102     |
|                                                       |                        | Benzoic acid                                                                          | 102     |
| Phenolic compounds                                    | Paeonol                | 102                                                                                   |         |
| Fruit                                                 | Monoterpene glycosides | Albiflorin                                                                            | 102     |
|                                                       | Flavonoids             | Catechin                                                                              | 102     |
|                                                       |                        |                                                                                       |         |
|                                                       | Dimeric ellagitannins  | Paeonianin A                                                                          | 129     |
|                                                       |                        | Paeonianin B                                                                          | 129     |
|                                                       |                        | Paeonianin C                                                                          | 129     |
|                                                       |                        | Paeonianin D                                                                          | 129     |
|                                                       | Ellagitannin monomer   | Paeonianin E                                                                          | 129     |
| Carboxylic acids                                      | Gallic acid            | 102                                                                                   |         |
|                                                       | Benzoic acid           | 102                                                                                   |         |
| Phenolic compounds                                    | Paeonol                | 102                                                                                   |         |
| Rhizome                                               | Monoterpene glycosides | Albiflorin                                                                            | 102     |
|                                                       |                        | Paeoniflorin                                                                          | 102     |
|                                                       | Flavonoids             | Catechin                                                                              | 102     |
|                                                       | Carboxylic acids       | Gallic acid                                                                           | 102     |
|                                                       |                        | Benzoic acid                                                                          | 102     |
|                                                       | Phenolic compounds     | Paeonol                                                                               | 102     |
| Root and rhizome                                      | Triterpenes            | Oleanolic acid                                                                        | 130     |
|                                                       |                        | Ursolic acid                                                                          | 130     |
| Seed                                                  | Monoterpene glycosides | Paeoniflorin                                                                          | 102,131 |
|                                                       |                        | Albiflorin                                                                            | 102,131 |
|                                                       |                        | Oxypaeoniflorin                                                                       | 131     |
|                                                       |                        | 4''-Hydroxyl-albiflorin                                                               | 131     |
|                                                       |                        | Paeonidanin                                                                           | 131     |
|                                                       |                        | Albiflorin R1                                                                         | 131     |
|                                                       |                        | 4-O-Methyl-paeoniflorin                                                               | 131     |
|                                                       |                        | Oxypaeonidanin                                                                        | 131     |
|                                                       | Flavonoids             | Luteolin                                                                              | 132     |
|                                                       |                        | Catechin                                                                              | 102     |
|                                                       | Carboxylic acids       | Benzoic acid                                                                          | 102     |
|                                                       | Stilbenes              | <i>cis</i> - $\epsilon$ -Viniferin                                                    | 133     |
|                                                       |                        | <i>trans</i> - $\epsilon$ -Viniferin                                                  | 132-134 |
|                                                       |                        | Resveratrol                                                                           | 132,133 |
|                                                       |                        | Gnetin H                                                                              | 132,133 |
|                                                       |                        | Suffruticosol A                                                                       | 132-134 |
| Suffruticosol B                                       |                        | 133,134                                                                               |         |
| <i>trans</i> -Resveratrol-4'-O-beta-D-glucopyranoside |                        | 133                                                                                   |         |
| <i>trans</i> -Gnetin H                                | 134                    |                                                                                       |         |

**Table S3.** Secondary metabolites in *Paeonia veitchii*.

| Part               | Class                                                                                            | PSM                                                                                                                                                                      | References |
|--------------------|--------------------------------------------------------------------------------------------------|--------------------------------------------------------------------------------------------------------------------------------------------------------------------------|------------|
| Root               | Monoterpene glycosides                                                                           | Acetoxypaeoniflorin                                                                                                                                                      | 135        |
|                    |                                                                                                  | Paeoniflorin                                                                                                                                                             | 136-138    |
|                    |                                                                                                  | Albiflorin (pinnae-type monoterpenes)                                                                                                                                    | 136,137    |
|                    |                                                                                                  | Benzoylpaeoniflorin                                                                                                                                                      | 136,137    |
|                    |                                                                                                  | Hydroxypaeoniflorin                                                                                                                                                      | 137        |
|                    |                                                                                                  | Benzoylhydroxypaeoniflorin                                                                                                                                               | 137        |
|                    |                                                                                                  | 8-Debenzoylpaeoniflorin                                                                                                                                                  | 118        |
|                    |                                                                                                  | Lactiflorin                                                                                                                                                              | 118        |
|                    |                                                                                                  | Oxypaeoniflorin                                                                                                                                                          | 118        |
|                    |                                                                                                  | Paeoniflorigenone                                                                                                                                                        | 118        |
|                    |                                                                                                  | (Z)-(1S,5R)- $\beta$ -Pinen-10-yl- $\beta$ -vicianoside                                                                                                                  | 118        |
|                    |                                                                                                  | 4-O-Methyloxypaeoniflorin                                                                                                                                                | 138        |
|                    |                                                                                                  | 4-O-Ethylpaeoniflorin                                                                                                                                                    | 138        |
|                    |                                                                                                  | Paeonidanin                                                                                                                                                              | 138        |
|                    |                                                                                                  | 9-Ethyl-neo-paeoniaflorin A                                                                                                                                              | 138        |
|                    |                                                                                                  | 4-O-Methyl-paeoniflorin                                                                                                                                                  | 108,138    |
|                    |                                                                                                  | Paeonidanin I                                                                                                                                                            | 139        |
|                    |                                                                                                  | Paeonidanin J                                                                                                                                                            | 139        |
|                    |                                                                                                  | Paeonidanin K (dimeric monoterpene glycoside)                                                                                                                            | 139        |
|                    |                                                                                                  | Galloylpaeoniflorin                                                                                                                                                      | 140        |
|                    | Oxypaeoniflorin                                                                                  | 140                                                                                                                                                                      |            |
|                    | Monoterpenes                                                                                     | Paeonisothonjone                                                                                                                                                         | 137        |
|                    |                                                                                                  | Paeoveitol A                                                                                                                                                             | 141        |
|                    |                                                                                                  | Paeoveitol B                                                                                                                                                             | 141        |
|                    |                                                                                                  | Paeoveitol C                                                                                                                                                             | 141        |
|                    | Triterpenes                                                                                      | Akebonic acid                                                                                                                                                            | 142        |
|                    |                                                                                                  | (3 $\beta$ ,4 $\beta$ ,11 $\alpha$ ,12 $\alpha$ ,13 $\beta$ )-11,12-Epoxy-4,13-dihydroxy-3,23-(isopropylidenedioxy)-24,30-dinorolean-20(29)-en-28-oic acid 28,13-lactone | 142        |
|                    |                                                                                                  | (3 $\beta$ ,4 $\beta$ ,11 $\alpha$ ,12 $\alpha$ ,13 $\beta$ )-11,12-Epoxy-3,13-dihydroxy-4,23-(isopropylidenedioxy)-24,30-dinorolean-20(29)-en-28-oic acid 28,13-lactone | 142        |
|                    |                                                                                                  | (3 $\beta$ ,4 $\alpha$ ,11 $\alpha$ ,12 $\alpha$ ,13 $\beta$ )-11,12-Epoxy-13-hydroxy-3,23-isopropylidenedioxy-30-norolean-20(29)-en-28-oic acid 28,13-lactone           | 142        |
|                    |                                                                                                  | (3 $\beta$ ,4 $\beta$ )-4-Hydroxy-3,23-(isopropylidenedioxy)-24,30-dinorolean-12,20(29)-dien-28-oic acid                                                                 | 142        |
|                    |                                                                                                  | Mudanpinoic acid A                                                                                                                                                       | 137        |
|                    | 24,30-Dinortriterpenoids                                                                         | $\beta$ -Sitosterol                                                                                                                                                      | 118        |
|                    |                                                                                                  | Paeonenoide A                                                                                                                                                            | 142        |
|                    |                                                                                                  | Paeonenoide B                                                                                                                                                            | 142        |
|                    | Norditerpenes                                                                                    | Paeonenoide C                                                                                                                                                            | 142        |
|                    |                                                                                                  | ( $\pm$ )-Paeoveitol                                                                                                                                                     | 143        |
|                    | Phytosterol                                                                                      | Daucosterol ( $\beta$ -sitosterol glucoside)                                                                                                                             | 118        |
|                    | Flavonoids                                                                                       | Catechin                                                                                                                                                                 | 136,140    |
|                    | Hydrolysable tannins                                                                             | Tellimagrandin II (eugeniin)                                                                                                                                             | 118        |
|                    | Carboxylic acids                                                                                 | Gallic acid                                                                                                                                                              | 136,144    |
|                    |                                                                                                  | Benzoic acid                                                                                                                                                             | 136,140    |
| Phenolic glycoside | 2-O-[ $\alpha$ -L-Arabinopyranosyl-(1 $\rightarrow$ 6)- $\beta$ -D-glucopyranoside]-benzaldehyde | 144                                                                                                                                                                      |            |
| Phenolic compounds | Pentagalloylglucose                                                                              | 136,144                                                                                                                                                                  |            |
|                    | Isosalicin                                                                                       | 144                                                                                                                                                                      |            |
|                    | Salicin                                                                                          | 144                                                                                                                                                                      |            |
|                    | Salicyl alcohol                                                                                  | 144                                                                                                                                                                      |            |
|                    | Methyl gallate                                                                                   | 144                                                                                                                                                                      |            |
|                    | Paeonol                                                                                          | 144                                                                                                                                                                      |            |
| Polyphenols        | 2-Hydroxybenzyl alcohol                                                                          | 137                                                                                                                                                                      |            |
|                    | 1,2,3,6-tetra-O-galloyl- $\beta$ -D-glucose                                                      | 118                                                                                                                                                                      |            |
| Esters             | $\beta$ -Sitosterol linoleate                                                                    | 140                                                                                                                                                                      |            |

|              |                         |                                                              |     |
|--------------|-------------------------|--------------------------------------------------------------|-----|
|              | Benzofurans             | Daucosterol linoleate                                        | 140 |
|              |                         | Paeoveitol D                                                 | 141 |
|              |                         | Paeoveitol E                                                 | 141 |
|              | Miscellaneous compounds | Arbutin                                                      | 140 |
|              |                         | His(2-hydroxybenzyl) ether                                   | 137 |
| Flower petal | Anthocyanin             | Cyanidin-3- <i>O</i> -glucoside-5- <i>O</i> -galactoside     | 145 |
|              |                         | Pelargonidin-3- <i>O</i> -glucoside-5- <i>O</i> -galactoside | 145 |

Table S4. Secondary metabolites in *Eriobotrya japonica*.

| Part                                                                            | Class       | PSM                                                                            | References                  |
|---------------------------------------------------------------------------------|-------------|--------------------------------------------------------------------------------|-----------------------------|
| Leaf                                                                            | Triterpenes | Ursolic acid                                                                   | 146-155                     |
|                                                                                 |             | Euscaphic acid                                                                 | 146,147,149,150,152,155-157 |
|                                                                                 |             | Maslinic acid                                                                  | 146,149,150,152,153,157,158 |
|                                                                                 |             | Oleanolic acid                                                                 | 149,150, 152,153,155-157    |
|                                                                                 |             | Corosolic acid                                                                 | 150,152-154,157-159         |
|                                                                                 |             | 3- <i>O</i> - <i>cis</i> - <i>p</i> -Coumaroyltormentic acid                   | 150,154,157,160             |
|                                                                                 |             | 3- <i>O</i> - <i>trans</i> - <i>p</i> -Coumaroyltormentic acid                 | 150,154,157,160             |
|                                                                                 |             | 2 $\alpha$ -Hydroxyursolic acid                                                | 147-149                     |
|                                                                                 |             | Tormentic acid                                                                 | 152-154,158                 |
|                                                                                 |             | Methyl maslinate                                                               | 146                         |
|                                                                                 |             | 2 $\alpha$ ,3 $\alpha$ -Diacetoxy-19 $\alpha$ -hydroxyurs-12-en-28-oic acid    | 146                         |
|                                                                                 |             | Maslinic acid diacetate                                                        | 146                         |
|                                                                                 |             | Methyl betulinatate                                                            | 150,152,157                 |
|                                                                                 |             | $\beta$ -Sitosterol                                                            | 154,161                     |
|                                                                                 |             | 2 $\alpha$ ,3 $\alpha$ ,19 $\alpha$ -Trihydroxyurs-12-en-28-oic acid           | 162,163                     |
|                                                                                 |             | Methyl ursolate                                                                | 150,157                     |
|                                                                                 |             | $\delta$ -Oleanolic acid                                                       | 150,157                     |
|                                                                                 |             | Betulinic acid                                                                 | 150,157                     |
|                                                                                 |             | 2 $\alpha$ ,3 $\alpha$ ,19 $\alpha$ -Trihydroxyolean-12-en-28-oic acid         | 153,158                     |
|                                                                                 |             | 2 $\alpha$ ,3 $\alpha$ -Dihydroxyursolic acid                                  | 153,158                     |
|                                                                                 |             | 3 $\beta$ ,6 $\alpha$ ,19 $\alpha$ -Trihydroxyurs-12-en-28-oic acid            | 147                         |
|                                                                                 |             | 3,6,19-Trihydroxyurs-12-en-28-oic acid                                         | 164                         |
|                                                                                 |             | 2,3-Dihydroxyurs-12-en-28-oic acid                                             | 164                         |
|                                                                                 |             | 23- <i>trans</i> - <i>p</i> -Coumaroyltormentic acid                           | 162                         |
|                                                                                 |             | 23- <i>cis</i> - <i>p</i> -Coumaroyltormentic acid                             | 162                         |
|                                                                                 |             | 3- <i>O</i> - <i>trans</i> -Caffeoyltormentic acid                             | 162                         |
|                                                                                 |             | 3- <i>O</i> - <i>trans</i> - <i>p</i> -Coumarolyrotundic acid                  | 162                         |
|                                                                                 |             | 3 $\beta$ ,6 $\beta$ ,19 $\alpha$ -Trihydroxyurs-12-en-28-oic acid             | 162                         |
|                                                                                 |             | 2 $\alpha$ ,3 $\beta$ ,19 $\alpha$ ,23-Tetrahydroxyurs-12-en-28-oic acid       | 162                         |
|                                                                                 |             | 3- <i>O</i> - <i>trans</i> -Feruloyl euscaphic acid                            | 165                         |
|                                                                                 |             | Pomolic acid                                                                   | 149                         |
|                                                                                 |             | 2 $\alpha$ ,3 $\alpha$ ,19 $\alpha$ -Trihydroxy-12-oleanen-28-oic acid         | 156                         |
|                                                                                 |             | 2 $\alpha$ -Hydroxyoleanolic acid                                              | 156                         |
|                                                                                 |             | Methyl arjunolate                                                              | 150                         |
|                                                                                 |             | 2 $\alpha$ , 3 $\alpha$ ,23-Trihydroxyolean-12-en-28-oic acid                  | 150                         |
|                                                                                 |             | 3-Epicorosolic acid                                                            | 150                         |
|                                                                                 |             | 1 $\beta$ -Hydroxyeuscaphic acid                                               | 150                         |
|                                                                                 |             | Usrolic acid lactone                                                           | 150                         |
|                                                                                 |             | 2 $\beta$ , 3 $\beta$ , 19 $\alpha$ -Trihydroxyurs-12-en-28-oic acid           | 163                         |
|                                                                                 |             | Methyl corosolate, (methyl 2 $\alpha$ -3 $\alpha$ -dihydroxyurs-12-en-28-oate) | 152                         |
|                                                                                 |             | Arjunolic acid                                                                 | 158                         |
| Methyl 2 $\alpha$ -hydroxyursolate                                              | 158         |                                                                                |                             |
| Urs-12-en-28-oic acid,3-hydroxyl-methyl ester (3 $\alpha$ )                     | 166         |                                                                                |                             |
| Squalene                                                                        | 166         |                                                                                |                             |
| $\alpha$ -Hydroxyoleanolic acid                                                 | 155         |                                                                                |                             |
| Arjunic acid                                                                    | 155         |                                                                                |                             |
| 3 $\alpha$ - <i>trans</i> -Feruloyloxy-2 $\alpha$ -hydroxyurs-12-en-28-oic acid | 161         |                                                                                |                             |

|                                          |                                                                                                                                                                                                                                           |                    |
|------------------------------------------|-------------------------------------------------------------------------------------------------------------------------------------------------------------------------------------------------------------------------------------------|--------------------|
|                                          | 3- <i>O</i> - <i>trans</i> -Feruloyl-leucoscapic acid                                                                                                                                                                                     | 161                |
| Sesquiterpene glycosides                 | Loquatifolin A                                                                                                                                                                                                                            | 167                |
|                                          | Nerolidol-3- <i>O</i> - $\alpha$ -L-rhamnopyranosyl-(1 $\rightarrow$ 2)- $\beta$ -D-glucopyranoside                                                                                                                                       | 168                |
|                                          | Nerolidol-3- <i>O</i> - $\alpha$ -L-rhamnopyranosyl-(1 $\rightarrow$ 4)- $\alpha$ -L-rhamnopyranosyl-(1 $\rightarrow$ 2)- $\beta$ -D-glucopyranoside                                                                                      | 168                |
|                                          | Nerolidol-3- <i>O</i> - $\alpha$ -L-rhamnopyranosyl-(1 $\rightarrow$ 4)- $\alpha$ -L-rhamnopyranosyl-(1 $\rightarrow$ 6)- $\beta$ -D-glucopyranoside                                                                                      | 168                |
|                                          | Isohumbertiol-3- <i>O</i> -{ $\alpha$ -L-rhamnopyranosyl-(1 $\rightarrow$ 4)- $\alpha$ -L-rhamnopyranosyl-(1 $\rightarrow$ 2)-{ $\alpha$ -L-rhamnopyranosyl-(1 $\rightarrow$ 6)}}- $\beta$ -D-glucopyranoside                             | 169                |
|                                          | Isohumbertiol-3- <i>O</i> -{ $\alpha$ -L-rhamnopyranosyl-(1 $\rightarrow$ 4)- $\alpha$ -L-rhamnopyranosyl-(1 $\rightarrow$ 2)-{ $\alpha$ -L-(4- <i>trans</i> -feruloyl)-rhamnopyranosyl-(1 $\rightarrow$ 6)}}- $\beta$ -D-glucopyranoside | 169                |
|                                          | Nerolidol-3- <i>O</i> - $\alpha$ -L-rhamnopyranosyl-(1 $\rightarrow$ 4)- $\alpha$ -L-rhamnopyranosyl-(1 $\rightarrow$ 2)-[ $\alpha$ -L-(4- <i>trans</i> -feruloyl)-rhamnopyranosyl-(1 $\rightarrow$ 6)]- $\beta$ -D-glucopyranoside       | 169,170            |
|                                          | Nerolidol-3- <i>O</i> - $\alpha$ -L-rhamnopyranosyl-(1 $\rightarrow$ 6)- $\beta$ -D-glucopyranoside                                                                                                                                       | 171                |
|                                          | Nerolidol-3- <i>O</i> - $\alpha$ -L-rhamnopyranosyl-(1 $\rightarrow$ 2)-[ $\alpha$ -L-rhamnopyranosyl-(1 $\rightarrow$ 6)]- $\beta$ -D-glucopyranoside                                                                                    | 171                |
|                                          | $\beta$ -Monocyclonerolidol-3- <i>O</i> - $\alpha$ -L-rhamnopyranosyl-(1 $\rightarrow$ 4)- $\alpha$ -L-rhamnopyranosyl-(1 $\rightarrow$ 2)-[ $\alpha$ -L-rhamnopyranosyl-(1 $\rightarrow$ 6)]- $\beta$ -D-glucopyranoside                 | 172                |
|                                          | Nerolidol-3- <i>O</i> - $\alpha$ -L-rhamnopyranosyl-(1 $\rightarrow$ 4)- $\alpha$ -L-rhamnopyranosyl-(1 $\rightarrow$ 2)-[ $\alpha$ -L-rhamnopyranosyl-(1 $\rightarrow$ 6)]- $\beta$ -D-glucopyranoside                                   | 163,168,170,173    |
|                                          | Sesquiterpenes (essential oil)                                                                                                                                                                                                            | $\alpha$ -Ylangene |
| $\alpha$ -Farnesene                      |                                                                                                                                                                                                                                           | 174                |
| $\beta$ -Farnesene                       |                                                                                                                                                                                                                                           | 174                |
| $\alpha$ -Cadinol                        |                                                                                                                                                                                                                                           | 174                |
| $\alpha$ -Bisabolol                      |                                                                                                                                                                                                                                           | 175                |
| Monoterpenenes (fenchane monoterpenoids) | Vomifoliol                                                                                                                                                                                                                                | 158                |
| Monoterpenenes (essential oils)          | $\beta$ -Pinene                                                                                                                                                                                                                           | 174                |
|                                          | Camphene                                                                                                                                                                                                                                  | 174                |
|                                          | $\beta$ -Mycrene                                                                                                                                                                                                                          | 174                |
|                                          | $\rho$ -Cymene                                                                                                                                                                                                                            | 174                |
|                                          | Linalool                                                                                                                                                                                                                                  | 174                |
|                                          | <i>trans</i> -Linalool oxide                                                                                                                                                                                                              | 174                |
|                                          | Camphor                                                                                                                                                                                                                                   | 174                |
|                                          | Nerol                                                                                                                                                                                                                                     | 174                |
|                                          | $\alpha$ -Pinene                                                                                                                                                                                                                          | 175                |
|                                          | Limonene                                                                                                                                                                                                                                  | 175                |
| Flavonoids                               | Quercetin-3-rhamnoside                                                                                                                                                                                                                    | 148                |
|                                          | Quercetin-3-sambubioside                                                                                                                                                                                                                  | 148,160            |
|                                          | Kaempferol 3- <i>O</i> -rhamnoside                                                                                                                                                                                                        | 148,176            |
|                                          | Quercitrin                                                                                                                                                                                                                                | 177                |
|                                          | Afzelin                                                                                                                                                                                                                                   | 177                |
|                                          | Procyanidin B-2                                                                                                                                                                                                                           | 178,179            |
|                                          | Procyanidin C-1                                                                                                                                                                                                                           | 178,179            |
|                                          | Procyanidin oligomer                                                                                                                                                                                                                      | 178,179            |
|                                          | (2S)- and (2R)-Naringenin                                                                                                                                                                                                                 | 178                |
|                                          | 8- <i>C</i> - $\alpha$ -L-Rhamnopyranosyl-(1 $\rightarrow$ 2)- $\beta$ -D-glucopyranosides                                                                                                                                                | 178                |
|                                          | Cinchonain Id 7- <i>O</i> - $\beta$ -D-glucopyranoside                                                                                                                                                                                    | 178                |
|                                          | Cinchonain Ia                                                                                                                                                                                                                             | 178                |
|                                          | (-)-Epicatechin                                                                                                                                                                                                                           | 178                |
| cinchonain Ib                            | 178                                                                                                                                                                                                                                       |                    |

|                           |                                                                                                  |             |
|---------------------------|--------------------------------------------------------------------------------------------------|-------------|
|                           | Cinchonain Ic                                                                                    | 178         |
|                           | Cinchonain Id                                                                                    | 178         |
|                           | Epicatechin-(4 $\beta$ →2)-phloroglucinol                                                        | 178         |
|                           | (-)-Epigallocatechin gallate                                                                     | 178         |
|                           | Quercetin 3-O-sophoroside                                                                        | 178         |
|                           | Cinchonain Id 7-O-glucopyranoside                                                                | 179         |
|                           | Cinchonain IIb                                                                                   | 179         |
|                           | (2S)-Naringenin 8-C-rha (1''→2')-glucopyranoside                                                 | 179         |
|                           | Kaempferol 3-O- $\alpha$ -L-(2'',4''-di-E-feruloyl)-rhamnoside                                   | 180         |
|                           | Kaempferol 3-O- $\alpha$ -L-(2'',4''-di-Z-p-coumaroyl)-rhamnoside                                | 180         |
|                           | Kaempferol 3-O- $\alpha$ -L-(2'',4''-di-E-p-coumaroyl)-rhamnoside                                | 180,181     |
|                           | Quercetin 3-O-glucoside                                                                          | 176         |
|                           | Quercetin 3-O-galactoside                                                                        | 176         |
|                           | Kaempferol 3-O-glucoside                                                                         | 176         |
|                           | Kaempferol 3-O-galactoside                                                                       | 176         |
|                           | A kaempferol 3-O-dihexoside (probably the 3-O-sophoroside)                                       | 176         |
|                           | Kaempferol 3-O-neohesperidoside                                                                  | 176         |
|                           | Kaempferol 3-O-rutinoside                                                                        | 176         |
|                           | Isorhamnetin 3-O-glucoside                                                                       | 176         |
|                           | Isorhamnetin 3-O-galactoside                                                                     | 176         |
|                           | Quercetin 3-O-rutinoside (rutin)                                                                 | 163,176     |
|                           | Quercetin-3-O- $\beta$ -D-glucoside                                                              | 156         |
|                           | Quercetin-7- $\alpha$ -L-rhamnoside                                                              | 156         |
|                           | Rhamnocitrin                                                                                     | 158         |
|                           | Quercetin-4'-O- $\beta$ -D-galactoside                                                           | 158         |
|                           | Kaempferol-3-O- $\alpha$ -L-(3'',4''-E-di-p-coumaroyl)-rhamnoside                                | 181         |
|                           | Kaempferol-3-O- $\alpha$ -L-(3'',4''-di-E-p-coumaroyl)-rhamnoside                                | 181         |
|                           | Kaempferol-3-O- $\alpha$ -L-(2''-E-feruloyl,4''-E-pcoumaroyl)-rhamnoside                         | 181         |
|                           | Kaempferol-3-O- $\alpha$ -L-(2''-E-p-coumaroyl,4''-E-feruloyl)-rhamnoside                        | 181         |
|                           | Naringenin-8-C-rhamnoglucoside                                                                   | 160         |
|                           | Kaempferol 3-O-sophoroside                                                                       | 160         |
|                           | Kaempferol 3-O-rhamnosyl glucoside-7-O-rhaminoside                                               | 160         |
|                           | Quercetin 3-O-glucosylrhamnosyl-glucoside                                                        | 160         |
|                           | Cinchonain glucoside + (sodium)                                                                  | 160         |
| Ionone-derived glycosides | Vomifoliol-9-O- $\beta$ -D-glucopyranoside (roseoside)                                           | 169,182     |
|                           | 3-oxo- $\alpha$ -Ionyl-9-O- $\beta$ -D-glucopyranoside                                           | 169         |
|                           | 3-oxo- $\alpha$ -Ionyl-9-O- $\beta$ -D-apiofuranosyl-(1→6)- $\beta$ -D-glucopyranoside           | 169         |
|                           | Vomifoliol-9-O- $\beta$ -D-apiofuranosyl-(1→6)- $\beta$ -D-glucopyranoside                       | 169         |
|                           | (6S,9R)-Roseoside                                                                                | 179         |
| Glycosides                | Schaftoside (C-glycoside)                                                                        | 176         |
|                           | Arbutin                                                                                          | 182         |
|                           | Amygdalin                                                                                        | 183         |
| Phenylpropanoids          | Ferulic acid                                                                                     | 170         |
|                           | Phenylpropyl acid                                                                                | 163         |
|                           | Chlorogenic acid                                                                                 | 148         |
|                           | Methyl chlorogenate                                                                              | 148         |
|                           | Eugenyl $\beta$ -rutinoside                                                                      | 158         |
| Megastigmane glycosides   | Eriojaposide B                                                                                   | 161         |
|                           | (6R,9R)-3-oxo- $\alpha$ -Ionyl-9-O- $\alpha$ -apiofuranosyl-(1''→6')-O- $\beta$ -glucopyranoside | 161         |
|                           | Citroside A                                                                                      | 161         |
|                           | Eriojaposide A                                                                                   | 160,161,179 |
|                           | (6S,9R)-Vomifoliol-9-O- $\beta$ -apiofuranosyl-(1''→6')-O- $\beta$ -glucopyranoside              | 161,179     |
|                           | (6S,9R)-Vomifoliol-9-O- $\beta$ -xylopyranosyl-(1''→6')-O- $\beta$ -                             | 161,179     |

|                |                                                                                                                                 |         |
|----------------|---------------------------------------------------------------------------------------------------------------------------------|---------|
|                | glucopyranoside                                                                                                                 |         |
|                | (6R,9R)-3-oxo- $\alpha$ -Ionyl-9-O- $\beta$ -glucopyranoside                                                                    | 161,179 |
|                | (6R,7E,9R)-9-Hydroxy-4,7-megastigmadien-3-one 9-O- $\beta$ -D-apiofuranosyl-(1 $\rightarrow$ 6)- $\beta$ -D-glucopyranoside     | 156     |
|                | (6R,7E,9R)-9-Hydroxy-4,7-megastigmadien-3-one 9-O- $\beta$ -D-xylopyranosyl-(1 $\rightarrow$ 6)- $\beta$ -D-glucopyranoside     | 156     |
|                | (6R,7E,9R)-9-Hydroxy-4,7-megastigmadien-3-one 9-O- $\alpha$ -L-arabinopyranosyl-(1 $\rightarrow$ 6)- $\beta$ -D-glucopyranoside | 156     |
|                | (6R,7E,9R)-9-Hydroxy-4,7-megastigmadien-3-one                                                                                   | 156     |
|                | (6R,7E,9R)-9-Hydroxy-4,7-megastigmadien-3-one 9-O- $\beta$ -D-glucopyranoside                                                   | 156     |
|                | (6R,7E,9S)-9-Hydroxy-4,7-megastigmadien-3-one 9-O- $\beta$ -D-glucopyranoside                                                   | 156     |
|                | (6S,7E,9R)-6,9-Dihydroxy-4,7-megastigmadien-3-one                                                                               | 156     |
|                | (6S,7E,9R)-6,9-Dihydroxy-4,7-megastigmadien-3-one 9-O- $\beta$ -D-glucopyranoside                                               | 156     |
| Lignans        | Linguersinol                                                                                                                    | 156     |
|                | 2,6-Dimethoxy-4-(2-propenyl)phenol                                                                                              | 156     |
|                | 2,6-Dimethoxy-4-(2-propenyl)phenol 1-O- $\beta$ -D-glucopyranoside                                                              | 156     |
| Essential oils | <i>cis</i> - $\beta$ , $\gamma$ -Hexenol                                                                                        | 174     |
|                | Tartaric acid                                                                                                                   | 174     |
|                | 1-Pentene-3-ol                                                                                                                  | 175     |
|                | ( <i>E</i> )-3-Penten-2-one                                                                                                     | 175     |
|                | Toluene                                                                                                                         | 175     |
|                | Furfural                                                                                                                        | 175     |
|                | 2-Methylbutene                                                                                                                  | 175     |
|                | 2-Hexenal                                                                                                                       | 175     |
|                | Ethylbenzene                                                                                                                    | 175     |
|                | 1-Hexanol                                                                                                                       | 175     |
|                | 1,3-Dimethylbenzene                                                                                                             | 175     |
|                | 3-Methyl-1-butyl acetate                                                                                                        | 175     |
|                | 2,6-Lutidine                                                                                                                    | 175     |
|                | 1,4-Dimethylbenzene                                                                                                             | 175     |
|                | $\alpha$ , $\beta$ -Angelica lactone                                                                                            | 175     |
|                | Benzaldehyde                                                                                                                    | 175     |
|                | 6-Methyl-hept-5-en-2-one(methyl heptenone)                                                                                      | 175     |
|                | 2,4-Heptadienal                                                                                                                 | 175     |
|                | 4-Methyl-1-cyclohexene                                                                                                          | 175     |
|                | 2-Hexenoic acid                                                                                                                 | 175     |
|                | Benzyl alcohol                                                                                                                  | 175     |
|                | 2-Phenylacetaldehyde                                                                                                            | 175     |
|                | $\gamma$ -Hexalactone                                                                                                           | 175     |
|                | 3,7-Dimethyl-1,6-octadien-3-ol                                                                                                  | 175     |
|                | Nonanal                                                                                                                         | 175     |
|                | Phenylethyl alcohol                                                                                                             | 175     |
|                | 2,6,6-Trimethyl-2-cyclohexene-1,4-dione                                                                                         | 175     |
|                | Hexanoic acid, 2-methyl-, ethyl ester                                                                                           | 175     |
|                | Safranal                                                                                                                        | 175     |
|                | Dihydrocoumarins                                                                                                                | 175     |
|                | (+)-Carvone                                                                                                                     | 175     |
|                | 2-Hexanoylfuran                                                                                                                 | 175     |
|                | Geraniol                                                                                                                        | 175     |
|                | 4-Methoxybenzaldehyde                                                                                                           | 175     |
|                | Cinnamaldehyde                                                                                                                  | 175     |
|                | Butenyl cyclohexene                                                                                                             | 175     |
|                | 1-Methoxy-4-(2-propenyl)-benzene                                                                                                | 175     |
|                | Indole                                                                                                                          | 175     |
|                | 2-Methoxy-4-vinylphenol                                                                                                         | 175     |

|        |                                     |                                                                      |             |
|--------|-------------------------------------|----------------------------------------------------------------------|-------------|
|        |                                     | Geranic acid (pheromones)                                            | 175         |
|        |                                     | $\beta$ -Damascone                                                   | 175         |
|        |                                     | $\alpha$ -Ionone                                                     | 175         |
|        |                                     | 1,4-Dimethoxy-2,3-dimethylbenzene                                    | 175         |
|        |                                     | Geranylacetone                                                       | 175         |
|        |                                     | $\beta$ -Ionone                                                      | 175         |
|        |                                     | $\beta$ -Bisabolene                                                  | 175         |
|        |                                     | 2,6-Di-tert-butyl-4-methylphenol                                     | 175         |
|        |                                     | Dihydroactinidiolide                                                 | 175         |
|        |                                     | Elemicin                                                             | 175         |
|        |                                     | (E)-Nerolidol                                                        | 175         |
|        |                                     | Caryophyllene                                                        | 175         |
|        |                                     | Butyl benzoate                                                       | 175         |
|        |                                     | 2,6-Dimethoxy-4-(2-propenyl)-phenol                                  | 175         |
|        |                                     | Farnesol                                                             | 175         |
|        |                                     | Farnesyl acetate                                                     | 175         |
|        |                                     | Methyl benzoate                                                      | 175         |
|        |                                     | 2,3-Biphenyl-2-cyclopropene-1-one                                    | 175         |
|        |                                     | 6,10,14-Trimethyl-2-pentadecanone                                    | 175         |
|        |                                     | Diisobutyl phthalate                                                 | 175         |
|        |                                     | Palmitic acid ethyl ester                                            | 175         |
|        |                                     | 9,12,15-Octadecatrien-1-ol,(Z,Z,Z)-                                  | 175         |
|        | Essential oils (aromatic compounds) | Thymol                                                               | 175         |
|        |                                     | Myristicin                                                           | 175         |
|        | Esters                              | Benzoic acid methyl ester                                            | 166         |
|        |                                     | Linoleic acid, ethyl ester                                           | 160         |
|        | Carboxylic acids                    | Gallic acid                                                          | 178         |
|        | Phenols                             | Ellagic acid                                                         | 178         |
|        | Miscellaneous compounds             | A-type dimeric procyanidin                                           | 160         |
|        |                                     | 9-O-Apiosyl (1–6) glucoside                                          | 166         |
|        |                                     | Neophytadiene                                                        | 166         |
|        |                                     | Dibenzofuran (phytoalexins)                                          | 176         |
| Flower | Triterpenes                         | Ursolic acid                                                         | 184-186     |
|        |                                     | Oleanolic acid                                                       | 184-186     |
|        |                                     | 2 $\alpha$ ,3 $\alpha$ ,19 $\alpha$ -Trihydroxyurs-5,12-dien-28-acid | 184         |
|        |                                     | 2 $\beta$ ,3 $\beta$ ,23 $\alpha$ -Trihydroxyolean-12-en-28-acid     | 184         |
|        |                                     | $\beta$ -Sitosterol                                                  | 186         |
|        |                                     | 3 $\beta$ ,19 $\alpha$ -Trihydroxyursolic-4-aldehyde-12-en-28-acid   | 186         |
|        |                                     | $\beta$ -Daucosterol                                                 | 186         |
|        |                                     | Maslinic acid                                                        | 186         |
|        |                                     | 2 $\alpha$ -Hydroxyursolic acid                                      | 186         |
|        | Sesquiterpenes                      | Nerolidol                                                            | 187         |
|        | Flavonoids                          | Hesperetin                                                           | 188         |
|        |                                     | Quercetin-3-O- $\alpha$ -L-galactoside                               | 186         |
|        | Glycosides                          | Amygdalin                                                            | 183,185,189 |
|        | Phenols                             | Gallic acid                                                          | 188         |
|        | Aldehydes                           | Hexadecanal                                                          | 187         |
|        |                                     | Octadecanal                                                          | 187         |
|        |                                     | <i>p</i> -Anisaldehyde                                               | 187,190     |
|        | Ketones                             | 6, 10, 14-trimethyl-2-pentadecanone                                  | 187         |
|        | Esters                              | 4-Methoxy methylbenzoate                                             | 187         |
|        |                                     | 4-Methoxy ethylbenzoate                                              | 187         |
|        |                                     | Phenyl ethyl octanoate                                               | 187         |
|        |                                     | Methyl hexadecanoate                                                 | 187         |
|        |                                     | Methyl hexadecanoate                                                 | 187         |
|        |                                     | Methyl linoleate                                                     | 187         |
|        |                                     | 3-Cyclopentylpropionic acid, decyl ester                             | 190         |

|                         |                                                                                                                                                                                               |     |
|-------------------------|-----------------------------------------------------------------------------------------------------------------------------------------------------------------------------------------------|-----|
|                         | Hexadecanoic acid, ethyl ester                                                                                                                                                                | 190 |
|                         | Phenylalanin, 4-amino-N-t-butyloxycarbonyl-, t-butyl ester                                                                                                                                    | 190 |
|                         | Benzoic acid, 4-methoxy-, methyl ester                                                                                                                                                        | 190 |
|                         | Benzoic acid, 4-methoxy-, ethyl ester                                                                                                                                                         | 190 |
|                         | 4-Methoxybenzoic acid, allyl ester                                                                                                                                                            | 190 |
|                         | Tridecanoic acid, 12-methyl-, methyl ester                                                                                                                                                    | 190 |
|                         | Dibutyl phthalate                                                                                                                                                                             | 190 |
|                         | Geranyl isovalerate                                                                                                                                                                           | 190 |
|                         | Cyclopropanebutanoic acid, 2-[[2-[[2-[(2-pentylcyclopropyl) methyl]cyclopropyl] methyl] cyclopropyl] methyl]-, methyl ester                                                                   | 190 |
|                         | Butyl octyl phthalate                                                                                                                                                                         | 190 |
|                         | Benzyl butyl phthalate                                                                                                                                                                        | 190 |
|                         | Hexadecanoic acid, ethyl ester                                                                                                                                                                | 190 |
|                         | Retinoic acid, methyl ester                                                                                                                                                                   | 190 |
|                         | Linoleic acid ethyl ester                                                                                                                                                                     | 190 |
|                         | 1,2-Benzenedicarboxylic acid, butyl octyl ester                                                                                                                                               | 190 |
| Organic acids           | Quinic acid                                                                                                                                                                                   | 191 |
|                         | Tartaric acid                                                                                                                                                                                 | 191 |
|                         | Citric acid                                                                                                                                                                                   | 191 |
|                         | Oxalic acid                                                                                                                                                                                   | 191 |
|                         | cis-Aconitic acid                                                                                                                                                                             | 191 |
|                         | Malic acid                                                                                                                                                                                    | 191 |
| Miscellaneous compounds | Butylated hydroxytoluene                                                                                                                                                                      | 187 |
|                         | 5,7,9(11)-Androstatriene,3-hydroxy-17-oxo-                                                                                                                                                    | 190 |
|                         | Benzoylformic acid                                                                                                                                                                            | 190 |
|                         | NOPOL                                                                                                                                                                                         | 190 |
|                         | 1,3-Dioxane,5-(hexadecyloxy)-2-pentadecyl-                                                                                                                                                    | 190 |
|                         | 1-Hexadecanol, 2-methyl-                                                                                                                                                                      | 190 |
|                         | 5 $\alpha$ -Cholestan-2-one,oxime                                                                                                                                                             | 190 |
|                         | Ethanone,1-(5,6,7,8-tetrahydro-2,8,8-trimethyl-4H-cyclohepta[b]furan-5-yl)-                                                                                                                   | 190 |
|                         | Tert-hexadecanethiol                                                                                                                                                                          | 190 |
|                         | 1-Chloroeicosane                                                                                                                                                                              | 190 |
|                         | 1-Eicosene                                                                                                                                                                                    | 190 |
|                         | Ethanol, 2-(octadecyloxy)-                                                                                                                                                                    | 190 |
|                         | Androst-5,7-dien-3-ol-17-one                                                                                                                                                                  | 190 |
|                         | Propanoic acid, 2-(3-acetoxy-4,4,14-trimethylandrost-8-en-17-yl)-                                                                                                                             | 190 |
|                         | 9-Octadecene, 1-[2-(octadecyloxy)ethoxy]-                                                                                                                                                     | 190 |
|                         | Heptadecane, 9-hexyl-                                                                                                                                                                         | 190 |
|                         | Benzoyl bromide                                                                                                                                                                               | 190 |
|                         | Methyl N-(N-benzoyloxycarbonyl-beta-l-aspartyl)- $\beta$ -d-glucosaminide                                                                                                                     | 190 |
|                         | Phthalaldehydic acid                                                                                                                                                                          | 190 |
|                         | Heptadecane, 1-bromo-                                                                                                                                                                         | 190 |
|                         | 5-Hydroxymethyl-1,1,4 $\alpha$ -trimethyl-6-methylenedecahydronaphthalen-2-ol                                                                                                                 | 190 |
|                         | 2-Bromotetradecanoic acid                                                                                                                                                                     | 190 |
|                         | E-8-Methyl-9-tetradecen-1-ol acetate                                                                                                                                                          | 190 |
|                         | Octadecane, 3-ethyl-5-(2-ethylbutyl)-                                                                                                                                                         | 190 |
|                         | 7-Methyl-Z-tetradecen-1-ol acetate                                                                                                                                                            | 190 |
|                         | Benz[e]azulene-3,8-dione,3 $\alpha$ ,4,6 $\alpha$ ,7,9,10,10 $\alpha$ ,10 $\beta$ -octahydro-3 $\alpha$ ,10 $\alpha$ -dihydroxy-5-(hydroxymethyl)-7-(1-hydroxy-1-methyl ethyl)-2,10-dimethyl- | 190 |
|                         | 1-Hexadecanol, 2-methyl-                                                                                                                                                                      | 190 |
|                         | psi, psi.-Carotene, 1,1',2,2'-tetrahydro-1,1'-dimethoxy-                                                                                                                                      | 190 |
|                         | (22S)-21-Acetoxy-6 $\alpha$ ,11 $\alpha$ -dihydroxy-16 $\alpha$ ,17 $\alpha$ -propylmethylenedioxypregna-1,4-diene-3,20-dione                                                                 | 190 |



|                                                       |                    |                                                                                                                                                                                                                   |         |
|-------------------------------------------------------|--------------------|-------------------------------------------------------------------------------------------------------------------------------------------------------------------------------------------------------------------|---------|
|                                                       |                    | 5,7,9(11)-Androstatriene, 3-hydroxy-17-oxo-                                                                                                                                                                       | 190     |
|                                                       |                    | Benzaldehyde                                                                                                                                                                                                      | 190     |
|                                                       |                    | 3-Carene                                                                                                                                                                                                          | 190     |
|                                                       |                    | Pregn-4-en-18-oic acid,<br>11-(acetyloxy)-6,7-epoxy-9,20-dihydroxy-3-one- $\gamma$ -lactone                                                                                                                       | 190     |
|                                                       |                    | 2-Hexadecanol                                                                                                                                                                                                     | 190     |
|                                                       |                    | Gibberellic acid                                                                                                                                                                                                  | 190     |
|                                                       |                    | Calarene epoxide                                                                                                                                                                                                  | 190     |
|                                                       |                    | 3-Methoxymethoxy-2,2-dimethyloct-4-ene                                                                                                                                                                            | 190     |
|                                                       |                    | Octadecane, 3-ethyl-5-(2-ethylbutyl)-                                                                                                                                                                             | 190     |
|                                                       |                    | Pregn-4-ene-3,20-dione,17,21-dihydroxy-, bis(O-methyloxime)                                                                                                                                                       | 190     |
|                                                       |                    | Bicyclo[4.3.0]nonane, 3-butyl-4-hexyl-                                                                                                                                                                            | 190     |
|                                                       |                    | 1-(+)-Ascorbic acid 2,6-dihexadecanoate                                                                                                                                                                           | 190     |
|                                                       |                    | Ergosteryl acetate                                                                                                                                                                                                | 190     |
|                                                       |                    | 7 $\alpha$ H-cyclopenta[ $\alpha$ ]cyclopropa[f]cycloundecene-2,4,7,7 $\alpha$ ,10,11-hexol, 1,1 $\alpha$ ,2,3,4,4 $\alpha$ ,5,6,7,10,11,11 $\alpha$ -dodecahydro-1,1,3,6,9-pentamethyl-,2,4,7,10,11-pentaacetate | 190     |
| Carotenoids                                           | Zeaxanthin         | 190                                                                                                                                                                                                               |         |
|                                                       | Fucoxanthin        | 190                                                                                                                                                                                                               |         |
|                                                       | Canthaxanthin      | 190                                                                                                                                                                                                               |         |
| Stem bark                                             | Triterpenes        | $\beta$ -Sitosterol                                                                                                                                                                                               | 192     |
|                                                       |                    | $\beta$ -Sitosterol-3-O- $\beta$ -D-glucopyranoside                                                                                                                                                               | 192     |
|                                                       |                    | Oleanolic acid                                                                                                                                                                                                    | 192     |
|                                                       | Flavonoids         | Catechin                                                                                                                                                                                                          | 192     |
|                                                       |                    | Cinchonain IIb                                                                                                                                                                                                    | 192     |
|                                                       | lignans            | Lyoniresinol                                                                                                                                                                                                      | 192     |
| Lyoniresinol 2 $\alpha$ -O- $\beta$ -D-xylopyranoside |                    | 192                                                                                                                                                                                                               |         |
| Root                                                  | Glycosides         | Amygdalin                                                                                                                                                                                                         | 183     |
| Seed                                                  | Triterpenes        | $\beta$ -Sitosterol                                                                                                                                                                                               | 193     |
|                                                       |                    | Kaempferol                                                                                                                                                                                                        | 194     |
|                                                       | Flavonoids         | Rutin                                                                                                                                                                                                             | 194     |
|                                                       |                    | Narigin                                                                                                                                                                                                           | 194     |
|                                                       |                    | 3,4-Dihydroxybenzoic acid                                                                                                                                                                                         | 194     |
|                                                       | Phenolic acids     | <i>trans</i> -Cinnamic acid                                                                                                                                                                                       | 194     |
|                                                       |                    | 5-Cafeoylquinic acid                                                                                                                                                                                              | 194     |
|                                                       |                    | <i>p</i> -Coumaric acid                                                                                                                                                                                           | 194     |
|                                                       |                    | Caffeic acid                                                                                                                                                                                                      | 195     |
|                                                       | Phenylpropanoids   | Chlorogenic acid                                                                                                                                                                                                  | 195     |
| Benzoic acid                                          |                    | 195                                                                                                                                                                                                               |         |
| Fruit                                                 | Triterpenes        | Ursolic acid                                                                                                                                                                                                      | 196     |
|                                                       |                    | Oleanolic acid                                                                                                                                                                                                    | 196     |
|                                                       | Glycosides         | Amygdalin                                                                                                                                                                                                         | 183     |
|                                                       | Leucoanthocyanidin | Loquatoside                                                                                                                                                                                                       | 197     |
|                                                       | Organic acids      | Quinic acid                                                                                                                                                                                                       | 191     |
|                                                       |                    | Tartaric acid                                                                                                                                                                                                     | 191     |
|                                                       |                    | Citric acid                                                                                                                                                                                                       | 191,198 |
|                                                       |                    | Oxalic acid                                                                                                                                                                                                       | 191     |
|                                                       |                    | <i>cis</i> -Aconitic acid                                                                                                                                                                                         | 191     |
|                                                       |                    | Malic acid                                                                                                                                                                                                        | 191,198 |
|                                                       |                    | Fumaric acid                                                                                                                                                                                                      | 198     |
|                                                       |                    | Succinic acid                                                                                                                                                                                                     | 198     |
|                                                       | Phenolic compounds | Ortho-diphenol                                                                                                                                                                                                    | 198     |
|                                                       |                    | Chlorogenic acid                                                                                                                                                                                                  | 199     |
|                                                       |                    | Neochlorogenic acid                                                                                                                                                                                               | 199     |
|                                                       |                    | Hydroxybenzoic acid                                                                                                                                                                                               | 199     |
| 5- <i>p</i> -Feruloylquinic acid                      |                    | 199                                                                                                                                                                                                               |         |
| Protocatechuic acid                                   |                    | 199                                                                                                                                                                                                               |         |

|  |                       |                                                 |         |
|--|-----------------------|-------------------------------------------------|---------|
|  |                       | 4-Caffeoylquinic acid                           | 199     |
|  |                       | Epicatechin                                     | 199     |
|  |                       | O-Coumaric acid                                 | 199     |
|  |                       | Ferulic acid                                    | 199     |
|  |                       | <i>p</i> -Coumaric acid                         | 199     |
|  | Carotenoids           | $\beta$ -Carotene                               | 198,200 |
|  |                       | Neo- $\beta$ -carotene U                        | 200     |
|  |                       | Neo- $\beta$ -carotene B                        | 200     |
|  |                       | Cryptoxanthin                                   | 198     |
|  | Alcohols              | 1-Propanol                                      | 201     |
|  |                       | 2-Methyl-1-propanol                             | 201     |
|  |                       | 1-Butanol                                       | 201     |
|  |                       | 2-Methyl-2-butanol                              | 201     |
|  |                       | 2-Pentanol                                      | 201     |
|  |                       | 3-Pentanol                                      | 201     |
|  |                       | 1-Penten-3-ol                                   | 201     |
|  |                       | 3-Penten-2-ol                                   | 201     |
|  |                       | ( <i>Z</i> )-2-Penten-1-ol                      | 201     |
|  |                       | 1-Hexanol                                       | 201     |
|  |                       | ( <i>E</i> )-2-Hexen-1-ol                       | 201     |
|  |                       | ( <i>E</i> )-3-Hexen-1-ol                       | 201     |
|  |                       | ( <i>Z</i> )-3-Hexen-1-ol                       | 201     |
|  |                       | 1-Heptanol                                      | 201     |
|  |                       | 1-Octanol                                       | 201     |
|  |                       | 2-Octanol                                       | 201     |
|  |                       | 1-Hexadecanol                                   | 201     |
|  |                       | Citronellol                                     | 201     |
|  |                       | 3,7-Dimethyl-1,5,7-octa-triene-3-ol (hotrienol) | 201     |
|  |                       | $\alpha$ -Terpineol                             | 201     |
|  |                       | Benzylalcohol                                   | 201     |
|  |                       | 2-Phenylethanol                                 | 201     |
|  | Carbonyls             | 2-Pentanone                                     | 201     |
|  |                       | Hexanal                                         | 201     |
|  |                       | ( <i>E</i> )-2-Hexenal                          | 201     |
|  |                       | 2,4-Dimethyl-3-pentan-one                       | 201     |
|  |                       | 2-Methyl-3-hexanone                             | 201     |
|  |                       | Octanal                                         | 201     |
|  |                       | 4-Octanone                                      | 201     |
|  |                       | Nonanal                                         | 201     |
|  |                       | Decanal                                         | 201     |
|  |                       | Geranylacetone                                  | 201     |
|  |                       | Benzaldehyde                                    | 201     |
|  |                       | $\beta$ -Ionone                                 | 201     |
|  |                       | Acetophenone                                    | 201     |
|  | 4-Methoxybenzaldehyde | 201                                             |         |
|  | Esters                | Ethyl acetate                                   | 201     |
|  |                       | Propylacetate                                   | 201     |
|  |                       | Methyl 2-methylbutanoate                        | 201     |
|  |                       | Methyl dodecanoate                              | 201     |
|  |                       | Ethyl dodecanoate                               | 201     |
|  |                       | Methylethyl tetradecanoate                      | 201     |
|  |                       | Methyl ( <i>E</i> )-cinnamate                   | 201     |
|  |                       | Ethyl ebcinnamate                               | 201     |
|  |                       | Dibutyl adipate                                 | 201     |
|  | Hydrocarbons          | <i>o</i> -Xylene                                | 201     |
|  |                       | <i>m</i> -Xylene                                | 201     |
|  |                       | <i>p</i> -Xylene                                | 201     |
|  |                       | Ethylbenzene                                    | 201     |

|  |                         |                       |     |
|--|-------------------------|-----------------------|-----|
|  |                         | Naphthalene           | 201 |
|  |                         | $\delta$ -3Carene     | 201 |
|  |                         | <i>p</i> -Cymene      | 201 |
|  |                         | Limonene              | 201 |
|  |                         | ( <i>E</i> )-Ocimene  | 201 |
|  |                         | ( <i>Z</i> )-Ocimene  | 201 |
|  | Carboxylic acids        | Benzoic acid          | 201 |
|  |                         | Cinnamic acid         | 201 |
|  | Miscellaneous compounds | $\delta$ -Octalactone | 201 |
|  |                         | N,N-Dimethylformamide | 201 |
|  |                         | Dimethyldisulfide     | 201 |

## References

- Habermam, J. Über das Glycyrrhizin; erste Abhandlung. *Justus Liebig's Annalen der Chemie* **1879**, *197*, 105–125.
- Sabbioni, C.; Mandrioli, R.; Ferranti, A.; Bugamelli, F.; Saracino, M.A.; Forti, G.C.; Fanali, S.; Raggi, M.A. Separation and analysis of glycyrrhizin, 18 $\beta$ -glycyrrhetic acid and 18 $\alpha$ -glycyrrhetic acid in liquorice roots by means of capillary zone electrophoresis. *J. Chrom. A* **2005**, *1081*, 65–71.
- Shin, Y.W.; Bae, E.A.; Lee, B.; Lee, S.H.; Kim, J.A.; Kim, Y.S.; Kim, D.H. In vitro and in vivo antiallergic effects of *Glycyrrhiza glabra* and its components. *Planta Med.* **2007**, *73*, 257–261.
- Shibano, M.; Ozaki, K.; Watanabe, H.; Tabata, A.; Taniguchi, M.; Baba, K. Determination of flavonoids in licorice using acid hydrolysis and reversed-phase hplc and evaluation of the chemical quality of cultivated licorice. *Planta Med.* **2010**, *76*, 729–733.
- Farag, M.A.; Porzel, A.; Wessjohann, L.A. Comparative metabolite profiling and fingerprinting of medicinal licorice roots using a multiplex approach of GC-MS, LC-MS and 1D NMR techniques. *Phytochemistry* **2012**, *76*, 60–72.
- Schmid, C.; Dawid, C.; Peters, V.; Hofmann, T. Saponins from European licorice roots (*Glycyrrhiza glabra*). *J. Nat. Prod.* **2018**.
- Beaton, J.M.; Spring, F.S. Triterpenoids. Part LI. The Isolation and characterisation of glabric acid, a new triterpenoid acid from liquorice root. *J. Chem. Soc.* **1956**, 2417–2419.
- Elgamal, M.H.A.; Fayez, M.B.E.; Snatzke, G. Constituents of local plants—VI. Liquoric acid, a new triterpenoid from the roots of *Glycyrrhiza glabra* L. *Tetrahedron* **1965**, *21*, 2109–2115.
- Saitoh, T.; Shibata, S. Chemical studies on the oriental plant drugs. XXII. Some new constituents of licorice root. (2) glycyrol, 5-*O*-methylglycyrol and isoglycyrol. *Chem. Pharm. Bull.* **1969**, *17*, 739–734.
- Beasley, T.H.; Sr.; Ziegler, H.W.; Bell, A.D. Separation of major components in licorice using high-performance liquid chromatography. *J. Chrom. A* **1979**, *175*, 350–355.
- Amagaya S.; Sugishita E.; Ogihara, Y. Separation and quantitative analysis of 18 $\alpha$ -glycyrrhetic acid and 18 $\beta$ -glycyrrhetic acid in *Glycyrrhizae Radix* by gas-liquid chromatography. *J. Chrom.* **1985**, *320*, 430–434.
- Chamoli, A.; Ahmad, M.; Hasan, M.; Panda, B.P. Simultaneous determination of 18 $\alpha$ -glycyrrhetic acid and 18 $\beta$ -glycyrrhetic acid in *Glycyrrhiza glabra* root by reversed phase high-performance liquid chromatography. *Drug Des. Devel. Ther.* **2016**, *7*, 59–62. 78.
- Price, K.R.; Johnson, I.T.; Fenwick, G.R.; Malinow, M.R. The chemistry and biological significance of saponins in foods and feeding stuffs. *Crit. Rev. Food Sci. Nutr.* **1987**, *26*, 27–135.
- Elgamal, M.H.A.; Hady, F.K.A.; Hanna, A.G.; Mahran, G.H.; Duddeck, H. A further contribution to the triterpenoid constituents of *Glycyrrhiza glabra* L. *Z. Naturforsch. C* **1990**, *45c*, 937–941.
- Hu, J.; Shen, F. A survey of the studies on chemical constituents of *Glycyrrhiza*. *Natural Products research and Development* **1996**, *8*, 77–91. (In Chinese)
- Wei, J.; Zheng, Y.; Li, C.; Tang, Y.; Peng, G. Bioactive constituents of oleanane-type triterpene saponins from the roots of *Glycyrrhiza glabra*. *J. Asian Nat. Prod. Res.* **2014**, *16*, 1044–1053.
- Rizzato, G.; Scalabrin, E.; Radaelli, M.; Capodaglio, G.; Piccolo, O. A new exploration of licorice metabolome. *Food Chem.* **2017**, *221*, 959–968.
- Wei, J. Bioactive constituents of oleanane-type triterpene saponins from the roots of *Glycyrrhiza glabra*. M.D. Thesis, Nanjing University of Chinese Medicine, China, June 2015. (In Chinese)

19. Shaikh, A. An update on secondary metabolites from *Glycyrrhiza* species. *J. Basic App. Sci.* **2017**, *13*, 431–436.
20. Farag, M.A.; Wessjohann, L.A. Volatiles profiling in medicinal licorice roots using steam distillation and solid-phase microextraction (SPME) coupled to chemometrics. *J. Food Sci.* **2012**, *77*, 1179–1184.
21. Zhao, T.; Dong, Y.; Zhao, M. Gas chromatography-mass spectrometry analysis of volatiles components obtained from the *Glycyrrhiza glabra* L. leaf and root. *Science and Technology of Food Industry.* **2013**, *34*, 96–99. (In Chinese)
22. Kameoka, H.; Nakai, K. Components of essential oil from the root of *Glycyrrhiza glabra*. *Nippon Nageikagaku Kaishi.* **1987**, *61*, 1119–1121.
23. Reiners, W. 7-Hydroxy-4'-methoxy-isoflavan (formononetin) aus Süssholzwurzel. Über Inhaltsstoffe der Süssholzwurzel. II. *Spezialia* **1966**, *15*, 359.
24. Mitscher, L.A.; Park, Y.H.; Omoto, S.; Clark, G. W.; Clark, D. Antimicrobial agents from higher plants, *Glycyrrhiza glabra* L. (var. Spanish). I. Some antimicrobial isoflavans, isoflavones, flavanones and isoflavones. *HeteroCycles* **1978**, *9*, 1533–1538.
25. Hayashi, H.; Hiraoka, N.; Ikeshiro, Y.; Yamamoto, H. Organ specific localization of flavonoids in *Glycyrrhiza glabra* L. *Plant Sci.* **1996**, *116*, 233–238.
26. Khalaf, I.; Vlase, L.; Lazăr, D.; Corciovă, A.; Ivănescu, B.; Lazăr, M.I. HPLC-MS study of phytoestrogens from *Glycyrrhiza glabra*. *Farmacia* **2010**, *58*, 89–94.
27. Kattaev, N.Sh.; Nikonov, G.K. Flavonoids of *Glycyrrhiza glabra*. *Chem. Nat. Compd.* **1974**, *10*, 94–95.
28. Kinoshita, T.; Saitoh, T.; Shibata, S. The occurrence of an isoflavene and the corresponding isoflavone in licorice root. *Chem. Pharm. Bull.* **1976**, *24*, 991–994.
29. Kuroda, M.; Mimaki, Y.; Honda, S.; Tanaka, H.; Yokota, S.; Tatsumasa, M.T. Phenolics from *Glycyrrhiza glabra* roots and their PPAR- $\gamma$  ligand-binding activity. *Bioorg. Med. Chem.* **2010**, *18*, 962–970.
30. Bhardwaj, D.K.; Murari, R.; Seswadri, T.R.; Singh, R. Glyzarin, a new isoflavone from *Glycyrrhiza glabra*. *Phymckeminry* **1977**, *16*, 402–403.
31. Kinoshita, T.; Saitoh, T.; Shibata, S. A new isoflavone from licorice root. *Chem. Pharm. Bull.* **1978**, *26*, 141–143.
32. Hatano, T.; Kagawa, H.; Yasuhara, T.; Okuda, T. Two new flavonoids and other constituents in licorice root: their relative astringency and radical scavenging effects. *Chem. Pharm. Bull.* **1988**, *36*, 2090–2097.
33. Hatano, T.; Yasuhara, T.; Fukuda, T.; Noro, T.; Okuda, T. Phenolic constituents of licorice. II. Structures of licopyranocoumarin, licoaryl coumarin and glisoflavone, and inhibitory effects of licorice phenolics on xanthine oxidase. *Chem. Pharm. Bull.* **1989**, *37*, 3005–3009.
34. Fukai, T.; Tantai, L.; Nomura, T. Isoprenoid-substituted flavonoids from *Glycyrrhiza glabra*. *Phytochemistry* **1996**, *43*, 531–532.
35. Fukai, T.; Sheng, C.; Horikoshi, T.; Nomura, T. Isoprenylated flavonoids from underground parts of *Glycyrrhiza glabra*. *Phytochemistry* **1996**, *43*, 1119–1124.
36. Bhardwaj, D.K.; Singh, R. 'Glyzaglabrin', a new isoflavone from *Glycyrrhiza glabra*. *Letters to the Editor.* **1977**, *46*, 753.
37. Kinoshita, T.; Tamura, Y.; Mizutani, K. The isolation and structure elucidation of minor isoflavonoids from licorice of *Glycyrrhiza glabra* origin. *Chem. Pharm. Bull.* **2005**, *53*, 847–849.
38. Zhang, Y.; Yang, Y.; Gong, H.; Zhu, H. A systematic review of the comparison of three medicinal licorices, based on differences of the types and contents about their bioactive components. *J. Chem. Biol. Pharm. Chem.* **2018**, *1*, 1.
39. Bhardwaj, D.K.; Murari, R.; Seswadri, T.R.; Singh, R. Occurrence of 2-methylisoflavones in *Glycyrrhiza glabra*. *Phytochemistry* **1976**, *15*, 352–353.
40. Yang, L.; Liu, Y.; Lin, S. HPLC analysis of flavonoids in the root of six *Glycyrrhiza* species. *Acta Pharm. Sin.* **1990**, *25*, 840–848. (In Chinese)
41. Saitoh, T.; Kinoshita, T.; Shibata, S. New isoflavan and flavanone from licorice root. *Chem. Pharm. Bull.* **1976**, *24*, 752–755.
42. Kinoshita, T.; Kajiyama, K.; Hiraga, Y.; Takahashi, K.; Tamura, Y.; Mizutani, K. Isoflavan derivatives from *Glycyrrhiza glabra* (licorice). *HeteroCycles* **1996**, *43*, 581–588.
43. Fukai, T.; Satoh, K.; Nomura, T.; Sakagami, H. Preliminary evaluation of antinephritis and radical scavenging activities of glabridin from *Glycyrrhiza glabra*. *Fitoterapia* **2003**, *74*, 624–629.
44. Kamal, Y.T.; Singh, M.; Tamboli, E.T.; Parveen, R.; Zaidi, S.M.A.; Ahmad, S. Rapid RP-HPLC method for the quantification of glabridin in crude drug and in polyherbal formulation. *J. Chromatogr. Sci.* **2012**, *50*, 779–784.

45. Li, K.; Ji, S.; Song, W.; Kuang, Y.; Lin, Y.; Tang, S.; Cui, Z.; Qiao, X.; Yu, S.; Ye, M. Glycybridins A–K, bioactive phenolic compounds from *Glycyrrhiza glabra*. *J. Nat. Prod.* **2017**, *80*, 334–346.
46. Shibata, S.; Saitoh, T. The chemical studies on the oriental plant drugs. XIX. Some new constituents of licorice root. (1). The structure of licoricidin. *Chem. Pharm. Bull.* **1968**, *16*, 1932–1936.
47. Fukai, T.; Cai, B.; Maruno, K.; Miyakawa, Y.; Konishi, M.; Nomura, T. An isoprenylated flavanone from *Glycyrrhiza glabra* and rec-assay of licorice phenols. *Phytochemistry* **1998**, *49*, 2005–2013.
48. Fukai, T.; Nishizawa, J.; Yokoyama, M.; Tantai, L.; Nomura, T. Five new isoprenoid-substituted flavonoids, kanzonols M–P and R, from two *Glycyrrhiza* species. *HeteroCycles* **1994**, *38*, 1089–1098.
49. Saitoh, T.; Shibata, S. New type chalcones from licorice root. *Tetrahedron Lett.* **1975**, *50*, 4461–4462.
50. Zhuo, Y.; Wang, X.; Chen, W. Determination of licochalcone A in *Glycyrrhiza glabra* by HPLC. *Chinese Journal of Hospital Pharmacy* **2009**, *29*, 2134–2135. (In Chinese)
51. Fenwick, G.R.; Lutomski, J.; Nieman, C. Liquorice, *Glycyrrhiza glabra* L. - composition, uses and analysis. *Food Chem.* **1990**, *38*, 119–143.
52. Kinoshita, T.; Kajiyama, K.; Hiraga, Y.; Takahashi, K.; Tamura, Y.; Mizutani, K. The isolation of new pyrano-2-arylbenzofuran derivatives from the root of *Glycyrrhiza glabra*. *Chem. Pharm. Bull.* **1996**, *44*, 1218–1221.
53. Rafi, M.M.; Vastano, B.C.; Zhu, N.; Ho, C.; Ghai, G.; Rosen, R.T.; Gallo, M.A.; Dipaola, R.S. Novel polyphenol molecule isolated from licorice root (*Glycyrrhiza glabra*) induces apoptosis, G2/M cell cycle arrest, and Bcl-2 phosphorylation in tumor cell lines. *J. Agric. Food Chem.* **2002**, *50*, 677–684.
54. Wu, Y.; Meng, X.; Bao, Y.; Wang, S.; Kang, T. Simultaneous quantitative determination of nine active chemical compositions in traditional Chinese medicine *Glycyrrhiza* by RP-HPLC with full-time five-wavelength fusion method. *Am. J. Chin. Med.* **2013**, *41*, 211–219.
55. Khan, N.; Ali, S.A. HPLC-MS analysis of isoliquiritigenin from the root extract of *Glycyrrhiza glabra* for developing a novel depigmenting agent. *Bioscience Biotechnology Research Communications* **2014**, *7*, 89–93.
56. Gaur, R.; Gupta, V.K.; Singh, P.; Pal, A.; Darokar, M.P.; Bhakuni, R.S. Drug resistance reversal potential of isoliquiritigenin and liquiritigenin isolated from *Glycyrrhiza glabra* against methicillin-resistant *Staphylococcus aureus* (MRSA). *Phytother. Res.* **2016**, *30*, 1708–1715. 122.
57. Yang, R.; Yuan, B.; Ma, Y.; Zhou, S.; Zhang, H.; Liu, J.; Li, W.; Liu, Y. Simultaneous determination of liquiritin, isoliquiritin, liquiritigenin and isoliquiritigenin in *Glycyrrhiza uralensis* Fisch., *Glycyrrhiza glabra* L., and *Glycyrrhiza inflata* Bat. by HPLC. *Chinese Journal of Pharmaceutical Analysis* **2016**, *36*, 1729–1736.
58. Paris, R.; Guillot, M. Liquiritoside, flavonoside from root of licorice, *Glycyrrhiza glabra* L. *Annales Pharmaceutiques Françaises.* **1955**, *13*, 592–595.
59. Kaur, R.; Kaur, H.; Dhindsa, A.S. *Glycyrrhiza glabra*: a phytopharmacological review. *Int. J. Pharm. Sci. Res.* **2013**, *4*, 2470–2477.
60. Fukai, T.; Wang, Q.; Kitaqawa, T.; Kusano, K.; Nomura, T.; Iitaka, Y. Structures of six isoprenoio-substiwted flavonoids, gancaonins F, G, R, I, glycyrol, and isoglycyrol from xibei licorice (*Glycyrrhiza* sp.). *HeteroCycles* **1989**, *29*, 1761–1772.
61. Demizu, S.; Kajiyama, K.; Takahashi, K.; Hiraga, Y.; Yamamoto, S.; Tamura, Y.; Okada, K.; Kinoshita, T. Antioxidant and antimicrobial constituents of licorice: isolation and structure elucidation of a new benzofuran derivative. *Chem. Pharm. Bull.* **1988**, *36*, 3474–3479.
62. Saitoh, T.; Kinoshita, T.; Shibata, S. Flavonols of licorice root. *Chem. Pharm. Bull.* **1976a**, *24*, 1242–1245.
63. Asl, M.N.; Hosseinzadeh, H. Review of pharmacological effects of *Glycyrrhiza* sp. and its bioactive compounds. *Phytother. Res.* **2008**, *22*, 709–724.
64. Li, J.; Wang, Y.; Deng, Z. Two new compounds from *Glycyrrhiza glabra*. *J. Asian Nat. Prod. Res.* **2005**, *7*, 677–680.
65. Dirican, E.; Turkez, H. In vitro studies on protective effect of *Glycyrrhiza glabra* root extracts against cadmium-induced genetic and oxidative damage in human lymphocytes. *Cytotechnology* **2014**, *66*, 9–16.
66. Wang, X. Determination of the content of liquiritin in licorice by thin layer densitometry. *Chinese Journal of Pharmaceutical Analysis* **1990**, *10*, 351–352. (In Chinese)
67. Dong, Y. Purification of flavonoids from *Glycyrrhiza glabra* L. leaf and their biological activities and applications. **2016**.
68. Reiners, W. Cumarine und Hydroxyzimtsäuren aus Süßholzwurzel. *Naturwissenschaften* **1964**, *51*, 193.

69. Frattini, C.; Bicchi, C.; Barettoni, C.; Nano, G.M. Volatile flavor components of licorice. *J. Agr. Food Chem.* **1977**, *25*, 1238–1241.
70. Bhardwaj, D.K.; Murari, R.; Seswadri, T.R.; Singh, R. Liqcoumarin, a novel coumarin from *Glycyrrhiza glabra*. *Phytochemistry* **1976**, *15*, 1182–1183.
71. Kinoshita, T.; Saitoh, T.; Shibata, S. A new 3-arylcoumarin from licorice root. *Chem. Pharm. Bull.* **1978a**, *26*, 135–140.
72. Ma, J. Studies on the secondary metabolites of four *Glycyrrhiza* species in China. M.D. Thesis, Northwest Normal University, Gansu, China, May 2004. (In Chinese)
73. Näf, R.; Jaquier, A. New lactones in liquorice (*Glycyrrhiza glabra* L.). *Flavour. Fragr. J.* **2006**, *21*, 193–197.
74. Biondi, D.M.; Rocco, C.; Ruberto, G. New dihydrostilbene derivatives from the leaves of *Glycyrrhiza glabra* and evaluation of their antioxidant activity. *J. Nat. Prod.* **2003**, *66*, 477–480.
75. Biondi, D.M.; Rocco, C.; Ruberto, G. Dihydrostilbene derivatives from *Glycyrrhiza glabra* leaves. *J. Nat. Prod.* **2005**, *68*, 1099–1102.
76. Hayashi, H.; Yasuma, M.; Hiraoka, N.; Ikeshiro, Y.; Yamamoto, H.; Yeşilada, E.; Sezik, E.; Honda, G.; Tabat, M. Flavonoid variation in the leaves of *Glycyrrhiza glabra*. *Phytochemistry* **1996**, *42*, 701–704.
77. Hayashi, H.; Hiraoka, N.; Ikeshiro, Y.; Yamamoto, H.; Yoshikawa, T. Seasonal variation of glycyrrhizin and isoliquiritigenin glycosides in the root of *Glycyrrhiza glabra* L. *Biol. Pharm. Bull.* **1998**, *21*, 987–989.
78. Statti, G.A.; Tundis, R.; Sacchetti, G.; Muzzoli, M.; Bianchi, A.; Menichini, F. Variability in the content of active constituents and biological activity of *Glycyrrhiza glabra*. *Fitoterapia* **2004**, *75*, 371–374.
79. Chin, Y.; Jung, H.; Liu, Y.; Su, B.; Castoro, J.A.; Keller, W.J.; Pereira, M.A.; Kinghorn, A.D. Anti-oxidant constituents of the roots and stolons of licorice (*Glycyrrhiza glabra*). *J. Agr. Food Chem.* **2007**, *55*, 4691–4697.
80. Rathee, P.; Rathee, S.; Ahuja, D. Simultaneous quantification of glycyrrhetic acid and apigenin using HPTLC from *Glycyrrhiza glabra* Linn. *Eurasian J. Ana. Chem.* **2010**, *5*, 95–103.
81. Li, G.; Nikolic, D.; Breemen, R.B.V. Identification and chemical standardization of licorice raw materials and dietary supplements using UHPLC-MS/MS. *J. Agr. Food Chem.* **2016**, *64*, 8062–8070.
82. Zeng, L.; Lou, Z.; Zhang, R. Quality evaluation of Chinese licorice. *Acta Pharma Sin.* **1991**, *26*, 788–793. (In Chinese)
83. Hatano, T.; Fukuda, T.; Liu, Y.; Noro, T.; Okuda, T. Phenolic constituents of licorice. IV. Correlation of phenolic constituents and licorice specimens from various sources, and inhibitory effects of licorice extracts on xanthine oxidase and monoamine oxidase. *Yakugaku Zasshi* **1991**, *111*, 311–321.
84. Ma, S.; Abulizi, M. Kahaer, B.; He, Q. Study on the preparation technology of isoflavon glabridin from *Glycyrrhiza glabra* L. *Journal of Xinjiang Medical University* **2007**, *30*, 692–694. (In Chinese)
85. Li, J.; Song, X.; Yu, B.; Li, Y. Content determination of glabridin in *Glycyrrhiza glabra* L. with HPLC. *Tianjin Journal of Traditional Chinese Medicine* **2008**, *25*, 157–158. (In Chinese)
86. Luo, C.; Wang, X.; Jiang, F. Determination of glabridin in *Glycyrrhiza glabra* L. by RP-HPLC. *Journal of Nongken Medicine* **2009**, *31*, 311–313.
87. Ammar, N.M.; El-Hawary, S.S.; El-anssary, A.A.; Othman, N.; Galal, M.; El-Desoky, A.H. Phytochemical and clinical studies of the bioactive extract of *Glycyrrhiza glabra* L. family leguminosae. *International Journal of Phytomedicine* **2012**, *4*, 429–436.
88. Martins, N.; Barros, L.; Dueñas, M.; Santos-Buelga, C.; Ferreira, I.C.F.R. Characterization of phenolic compounds and antioxidant properties of *Glycyrrhiza glabra* L. rhizomes and roots. *RSC Adv.* **2015**, *5*, 26991–26997.
89. Yu, J.; Wang, S.; Gao, W. Identification of vitexin in *Glycyrrhiza glybra* L. *Strait Pharmaceutical Journal* **2012**, *24*, 40–41. (In Chinese)
90. Hayashi, H.; Fukui, H.; Tabata, M. Examination of triterpenoids produced by callus and cell suspension cultures of *Glycyrrhiza glabra*. *Plant Cell Rep.* **1988**, *7*, 508–511.
91. Asada, Y.; Li, W.; Yoshikawa, T. The first prenylated baurone, licoagrone from hairy root cultures of *Glycyrrhiza glabra*. *Phytochemistry* **1999**, *49*, 1015–1019.
92. Li, W.; Asada, Y.; Yoshikawa, T. Antimicrobial flavonoids from *Glycyrrhiza glabra* hairy root cultures. *Planta Med.* **1998**, *64*, 746–747.
93. Asada, Y.; Li, W.; Yoshikawa, T. Isoprenylated flavonoids from hairy root cultures of *Glycyrrhiza glabra*. *Phytochemistry* **1998**, *47*, 389–392.

94. Hatano, T.; Fukuda, T.; Miyase, T.; Noro, T.; Okuda, T. Phenolic constituents of licorice. III. Structures of glicoricone and licofuranone, and inhibitory effects of licorice constituents on monoamine oxidase. *Chem. Pharm. Bull.* **1991b**, *39*, 1238–1243.
95. Rahman, H.; Khan, I.; Hussain, A.; Shahat, A.A.; Tawab, A.; Qasim, M.; Adnan, M.; Al-Said, M.S.; Ullah, R.; Khan, S.N. *Glycyrrhiza glabra* HPLC fractions: identification of aldehydo isoophiopogonone and liquiritigenin having activity against multidrug resistant Bacteria. *BMC Complement. Altern. Med.* **2018**, *18*.
96. Murakami, N.; Saka, M.; Shimada, H.; Matsuda, H.; Yamahara, J.; Yoshikawa, M. New bioactive monoterpene glycosides from *Paeoniae Radix*. *Chem. Pharm. Bull.* **1996**, *44*, 1279–1281.
97. Wang, X.; Jiao, W.; Liao, X.; Peng, S.; Ding, L. Monoterpene glycosides from the roots of *Paeonia lactiflora*. *Chinese Chemical Letters* **2006**, *17*, 916–918.
98. Zhang, X.; Gao, C.; Wang, J.; Li, X. A new monoterpene glycoside from *Paeonia lactiflora* Pall. *Acta Pharm. Sin.* **2002**, *37*, 705–708. (In Chinese)
99. Wang, Q.; Guo, H.; Huo, C.; Shi, Q.; Ye, M.; Bi, K.; Guo, D. Chemical constituents in root of *Paeonia lactiflora*. *Chinese Traditional and Herbal Drugs* **2007**, *38*, 972–976. (In Chinese)
100. Yen, P.; Kiem, P.; Nhiem, N.; Tung, N.; Quang, T.; Minh, C.; Kim, J.; Choi, E. A new monoterpene glycoside from the roots of *Paeonia lactiflora* increases the differentiation of osteoblastic MC3T3-E1 cells. *Arch. Pharm. Res.* **2007**, *30*, 1179–1185.
101. Kim, S.H.; Lee, M.K.; Lee, K.Y.; Sung, S.H.; Kim, J.; Kim, Y.C. Chemical constituents isolated from *Paeonia lactiflora* roots and their neuroprotective activity against oxidative stress in vitro. *J. Enzyme Inhib. Med. Chem.* **2009**, *24*, 1138–1140.
102. Jian, Z.; Yu, J.; Wang, W. RP-HPLC determination of main chemical components in different parts and different harvest periods of *Paeonia lactiflora*. *Acta Pharm. Sin.* **2010**, *45*, 489–493. (In Chinese)
103. Tan, J.; Zhao, Q.; Yang, L.; Shang, Z.; Du, Z.; Yan, M. Chemical constituents in roots of *Paeonia lactiflora*. *Chinese Traditional and Herbal Drugs* **2010**, *41*, 1245–1248. (In Chinese)
104. He, X.; Han, L.; Huang, X. A new phenolic glucoside from *Paeonia lactiflora*. *Chinese Herbal Medicines* **2011**, *3*, 84–86.
105. Li, P.; Zhang, Z.; Li, T.; Zhang, Y.; Sze, S.C.; Wang, G.; Li, Y.; Ye, W. Monoterpene derivatives from the roots of *Paeonia lactiflora* and their anti-proliferative activity. *Fitoterapia* **2014**, *98*, 124–129.
106. Bae, J.; Kim, C.Y.; Kim, H.J.; Park, J.H.; Ahn, M. Differences in the chemical profiles and biological activities of *Paeonia lactiflora* and *Paeonia obovata*. *J. Med. Food* **2015**, *18*, 224–232.
107. Liu, Y.; Ma, Y.; Yang, B.; Xiao, J.; Long, F.; Xu, Z.; Lv, G. Determination of bioactive components in *Paeonia lactiflora* roots cultivated in various areas by UHPLC. *Journal of Chinese Medicinal Materials* **2016**, *39*, 980–985. (In Chinese)
108. Shi, Y. Chemical constituents with anti-allergic activity from red peony root and a horticultural cultivar of *Paeonia lactiflora* and monoterpene profiles of peony related species. Ph.D. Thesis, University of Toyama, Yoyama, Japan, March 2016.
109. Liu, P.; Xu, Y.; Yan, H.; Chen, J.; Shang, E.; Qian, D.; Jiang, S.; Duan, J. Characterization of molecular signature of the roots of *Paeonia lactiflora* during growth. *Chin. J. Nat. Med.* **2017**, *15*, 0785–0793.
110. Li, B.; Bhandari, D.R.; Römpf, A.; Spengler, B. High-resolution MALDI mass spectrometry imaging of gallotannins and monoterpene glucosides in the root of *Paeonia lactiflora*. *Sci. Rep.* **2016**, *6*.
111. Braca, A.; Kiem, P.V.; Yen, P.H.; Nhiem, N.X.; Quang, T.H.; Cuong, N.X.; Minh, C.V. New monoterpene glycosides from *Paeonia lactiflora*. *Fitoterapia* **2008**, *79*, 117–120.
112. Kim, J.S.; Yean, M.H.; Lee, J.Y.; Kim, Y.J.; Lee, E.J.; Lee, S.Y.; Kang, S.S. A new monoterpene glucoside from the roots of *Paeonia lactiflora*. *Helvetica Chimica Acta* **2008**, *91*, 85–89.
113. Ren, M.; Zhang, X.; Ding, R.; Dai, Y.; Tu, F.; Cheng, Y.; Yao, X. Two new monoterpene glucosides from *Paeonia lactiflora* Pall. *J. Asian Nat. Prod. Res.* **2009**, *11*, 670–674.
114. Washida, K.; Yamagaki, T.; Iwashita, T.; Nomoto, K. Two new galloylated monoterpene glycosides, 4-O-galloylalbiflorin and 4'-O-galloylpaeoniflorin, from the roots of *Paeonia lactiflora* (*Paeoniae Radix*) grown and processed in Nara Prefecture, Japan. *Chem. Pharm. Bull.* **2009**, *57*, 1150–1152.
115. Wang, H.; Gu, W.; Chu, W.; Zhang, S.; Tang, X.; Qin, G. Monoterpene glucosides from *Paeonia lactiflora*. *J. Nat. Prod.* **2009**, *72*, 1321–1324.

116. Fu, Q.; Wang, S.; Zhao, S.; Chen, X.; Tu, P. Three new monoterpene glycosides from the roots of *Paeonia lactiflora*. *J. Asian Nat. Prod. Res.* **2013**, *15*, 697–702.
117. Fu, Q.; Yu, T.; Yuan, H.; Song, Y.; Zou, L. Paeonidanins F-H: three new dimeric monoterpene glycosides from *Paeonia lactiflora* and their anti-inflammatory activity. *Phytochem. Lett.* **2015**, *13*, 386–389.
118. Parker, S.; May, B.; Zhang, C.; Zhang, A.L.; Lu, C.; Xue, C.C. A pharmacological review of bioactive constituents of *Paeonia lactiflora* Pallas and *Paeonia veitchii* Lynch. *Phytother. Res.* **2016**, *30*, 1445–1473.
119. Fu, Q.; Qiu, L.; Yuan, H.; Yu, T.; Zou, L. Paeonenoides D and E: two new nortriterpenoids from *Paeonia lactiflora* and their inhibitory activities on NO production. *Helvetica Chimica Acta* **2016**, *99*, 46–49.
120. Fu, F.; Shang, T.; Hsu, T. Studies on the chemical constituents of the Chinese medical drug, root of *Paeonia lactiflora* Pall. *Yao Xue Xue Bao* **1963**, *10*, 555–557.
121. Liu, W.; Li, D.; Yang, H.; Chen, Y.; Wei, J.; Kang, W.; Guo, X. Determination of oleanic acid and paeoniflorin in *Paeonia lactiflora* by ultrasound-assisted ionic liquid-reversed phase liquid chromatography. *Zhongguo Zhong Yao Za Zhi* **2015**, *40*, 443–449. (In Chinese)
122. Guo, D.; Ye, G.; Guo, H. A new phenolic glycoside from *Paeonia lactiflora*. *Fitoterapia* **2006**, *77*, 613–614.
123. He, C.; Peng, Y.; Zhang, Y.; Xu, L.; Gu, J.; Xiao, P. Phytochemical and biological studies of Paeoniaceae. *Chem. Biodivers.* **2010**, *7*, 805–838.
124. Ngan, L.T.M.; Jang, M.J.; Kwon, M.J.; Ahn, Y.J. Antiviral activity and possible mechanism of action of constituents identified in *Paeonia lactiflora* root toward human rhinoviruses. *PLoS ONE* **2015**, *10*.
125. Stavri, M.; Mathew, K.T.; Bucar, F.; Gibbons, S. Pangelin, an antimycobacterial coumarin from *Ducrosia anethifolia*. *Planta Med.* **2003**, *69*, 956–959.
126. Shu, X.; Duan, W.; Liu, W.; Geng, Y.; Wang, X.; Yang, B.; Yang, P. Chemical constituents from flowers of *Paeonia lactiflora*. *Journal of Chinese Medicinal Materials* **2014**, *37*, 66–69. (In Chinese)
127. Magid, A.A.; Schmitt, M.; Prin, P.; Pasquier, L.; Voutquenne-Nazabadioko, L. In Vitro tyrosinase inhibitory and antioxidant activities of extracts and constituents of *Paeonia lactiflora* Pall. flowers. *The Natural Products Journal* **2017**, *7*, 237–245.
128. Shu, X.; Duan, W.; Liu, F.; Shi, X.; Geng, Y.; Wang, X.; Yang, B. Preparative separation of polyphenols from the flowers of *Paeonia lactiflora* Pall. by high-speed counter-current chromatography. *J. Chromatogr. B Analyt. Technol. Biomed. Life Sci.* **2014**, *947–948*, 62–67.
129. Tanaka, T.; Fukumori, M.; Ochi, T.; Kouno, I. Paeonianins A-E, new dimeric and monomeric ellagitannins from the fruits of *Paeonia lactiflora*. *J. Nat. Prod.* **2003**, *66*, 759–763.
130. Zhou, C.; Zhang, Y.; Sheng, Y.; Zhao, D.; Lv, S.; Hu, Y.; Tao, J. Herbaceous peony (*Paeonia lactiflora* Pall.) as an alternative source of oleanolic and ursolic acids. *Int. J. Mol. Sci.* **2011**, *12*, 655–667.
131. Liu, P.; Xu, Y.; Gao, X.; Zhu, X.; Du, M.; Wang, Y.; Deng, R.; Gao, J. Optimization of ultrasonic-assisted extraction of oil from the seed kernels and isolation of monoterpene glycosides from the oil residue of *Paeonia lactiflora* Pall. *Ind. Crop. Prod.* **2017**, *107*, 260–270.
132. Choi, C.W.; Choi, Y.H.; Cha, M.R.; Park, J.H.; Kim, Y.S.; Kim, Y.K.; Choi, S.U.; Yon, G.H.; Hong, K.S.; Kim, Y.H.; Ryu, S.Y.  $\alpha$ -Glucosidase inhibitors from seed extract of *Paeonia lactiflora*. *J. Korean Soc. Appl. Biol. Chem.* **2009**, *52*, 638–642.
133. Kim, H.J.; Chang, E.J.; Cho, S.H.; Chung, S.K.; Park, H.D.; Choi, S.W. Antioxidative activity of resveratrol and its derivatives isolated from seeds of *Paeonia lactiflora*. *Biosci. Biotechnol. Biochem.* **2002**, *66*, 1990–1993.
134. Yuk, H.J.; Ryu, H.W.; Jeong, S.H.; Curtis-Long, M.J.; Kim, H.J.; Wang, Y.; Song, Y.H.; Park, K.H. Profiling of neuraminidase inhibitory polyphenols from the seeds of *Paeonia lactiflora*. *Food Chem. Toxicol.* **2013**, *55*, 144–149.
135. Wu, S.; Luo, X.; Ma, Y.; Hao, X.; Wu, D. A new monoterpene glycoside from *Paeonia veitchii*. *Chinese Chemical Letters* **2002**, *13*, 430–431.
136. Wang, Q.; Liu, R.; Guo, H.; Ye, M.; Huo, C.; Bi, K.; Guo, D. Simultaneous LC determination of major constituents in red and white peony root. *Chromatographia* **2005**, *62*, 581–588.
137. Wu, S.; Chen, Y.; Yang, L.; Li, S.; Li, Z. Chemical constituents of *Paeonia veitchii*. *Chinese Traditional and Herbal Drugs* **2008**, *39*, 13–15. (In Chinese)
138. Xu, X.; Wu, Y. Studies on the separation of monoterpene glycosides from *Paeonia veitchii* Lynch. herbs. *Pharm. Chem. J.* **2016**, *50*, 568–572.



139. Fu, Q.; Tan, M.; Yuan, H.; Chen, J.; Fu, J. Monoterpene glycosides from *Paeonia veitchii*. *J. Asian Nat. Prod. Res.* **2017**, *19*, 22–27.
140. Wang, R.; Chou, G.; Zhu, E.; Wang, Z.; Bi, K. Studies on chemical constituents of *Paeonia veitchii* L. *Chinese Pharmaceutical Journal* **2007**, *42*, 662–663. (In Chinese)
141. Liang, W.; Ma, Y.; Geng, C.; Huang, X.; Xu, H.; Zhang, X.; Chen, J. Paeoveitols A-E from *Paeonia veitchii*. *Fitoterapia* **2015**, *106*, 36–40.
142. Wu, S.; Yang, S.; Wu, D.; Cheng, Y.; Peng, Q. Three novel 24,30-dinortriterpenoids, paeoneoides A-C, from *Paeonia veitchii*. *Helvetica Chimica Acta* **2005**, *88*, 259–265.
143. Liang, W.; Geng, C.; Zhang, X.; Chen, H.; Yang, C.; Rong, G.; Zhao, Y.; Xu, H.; Wang, H.; Zhou, N.; Ma, Y.; Huang, X.; Chen, J. (±)-Paeoveitol, a pair of new norditerpene enantiomers from *Paeonia veitchii*. *Org. Lett.* **2014**, *16*, 424–427.
144. Wang, R.; Chou, G.; Zhu, E.; Wang, Z.; Bi, K. A new phenolic glycoside from the roots of *Paeonia veitchii*. *J. Asian Nat. Prod. Res.* **2006**, *8*, 277–280.
145. Jia, N.; Shu, Q.; Wang, D.; Wang, L.; Liu, Z.; Ren, H.; Xu, Y.; Tian, D.; Tilt, K.M. Identification and characterization of anthocyanins by high-performance liquid chromatography–electrospray ionization–mass spectrometry in herbaceous peony species. *J. Am. Soc. for Hort. Sci.* **2008**, *133*, 418–426.
146. Shimizu, M.; Fukumura, H.; Tsuji, H.; Tanaami, S.; Hayashi, T.; Morita, N. Anti-inflammatory constituents of topically applied crude drugs. I. Constituents and anti-inflammatory effect of *Eriobotrya japonica* Lindl. *Chem. Pharm. Bull.* **1986**, *34*, 2614–2617.
147. Liang, Z.Z.; Aquino, R.; Feo, V.D.; Simone, F.D.; Pizza, C. Polyhydroxylated triterpenes from *Eriobotrya japonica*. *Planta Med.* **1990**, *56*, 330–332.
148. Jung, H.A.; Park, J.C.; Chung, H.Y.; Kim, J.; Choi, J.S. Antioxidant flavonoids and chlorogenic acid from the leaves of *Eriobotrya japonica*. *Arch. Pharm Res.* **1999**, *22*, 213–218.
149. Ju, J.; Zhou, L.; Lin, G.; Liu, D.; Wang, L.; Yang, J. Studies on constituents of triterpene acids from *Eriobotrya japonica* and their anti-inflammatory and antitussive effects. *Chinese Pharmaceutical Journal* **2003**, *8*, 753–757. (In Chinese)
150. Banno, N.; Akihisa, T.; Tokuda, H.; Yasukawa, K.; Taguchi, Y.; Akazawa, H.; Ukiya, M.; Kimura, Y.; Suzuki, T.; Nishino, H. Anti-inflammatory and antitumor-promoting effects of the triterpene acids from the leaves of *Eriobotrya japonica*. *Biol. Pharm. Bull.* **2005**, *28*, 1995–1999.
151. Hong, Y.; Lin, S.; Huang, X. Determination of ursolic acid in *Eriobotrya* leaves and terpenoid fingerprinting. *Acta Hort.* **2007**, *750*, 225–232.
152. Lv, H.; Chen, J.; Li, W.; Zhang, H. Studies on the Triterpenes from loquat leaf (*Eriobotrya japonica*). *Journal of Chinese Medicinal Materia* **2008**, *31*, 1351–1354. (In Chinese)
153. Li, E.; Luo, J.; Kong, L. Qualitative and quantitative determination of seven triterpene acids in *Eriobotrya japonica* Lindl. by high-performance liquid chromatography with photodiode array detection and mass spectrometry. *Phytochem. Anal.* **2009**, *20*, 338–343.
154. Rollinger, J.M.; Kratschmar, D.V.; Schuster, D.; Pfisterer, P.H.; Gumy, C.; Aubry, E.M.; Brandstötter, S.; Stuppner, H.; Wolber, G.; Odermatt, A. 11 $\beta$ -Hydroxysteroid dehydrogenase 1 inhibiting constituents from *Eriobotrya japonica* revealed by bioactivity-guided isolation and computational approaches. *Bioorganic. Med. Chem.* **2010**, *18*, 1507–1515.
155. Yang, Y.; Huang, Y.; Huang, C.; Lv, X.; Liu, L.; Wang, Y.; Li, J. Antifibrosis effects of triterpene acids of *Eriobotrya japonica* (Thunb.) Lindl. leaf in a rat model of bleomycin-induced pulmonary fibrosis. *J. Pharm. Pharmacol.* **2012**, *64*, 1751–1760.
156. Wu, Q.; Wang, M.; Simon, J.E.; Yu, S.; Xiao, P.; Ho, C. Studies on the chemical constituents of loquat leaves (*Eriobotrya japonica*). *ACS Symposium Series.* **2003**, *859*, 292–306.
157. Kikuchi, T.; Akazawa, H.; Tabata, K.; Manosroi, A.; Manosroi, J.; Suzuki, T. Akihisa, T. 3-O-(E)-p-coumaroyl tormentic acid from *Eriobotrya japonica* leaves induces caspase-dependent apoptotic cell death in human leukemia cell line. *Chem. Pharm. Bull.* **2011**, *59*, 378–381.
158. Li, E.; Zhou, G.; Kong, L. Chemical constituents from the leaves of *Eriobotrya japonica*. *Chin. J. Nat. Med.* **2009**, *7*, 190–192.
159. De Tommasi, N.; De Simone, F.; Cirino, G.; Cicala, C.; Pizza, C. Hypoglycemic effects of sesquiterpene glycosides and polyhydroxylated triterpenoids of *Eriobotrya japonica*. *Planta Med.* **1991**, *57*, 414–416.

160. Hu, C.; Chen, L.; Xin, Y.; Cai, Q. Determination of corosolic acid in *Eriobotrya japonica* leaves by reversed-phase high performance liquid chromatography. *Chinese Journal of Chromatography* **2006**, *24*, 492–494. (In Chinese)
161. Matalka, K.Z.; Abdulridha, N.A.; Badr, M.M.; Mansoor, K.; Qinna, N.A.; Qadan, F. *Eriobotrya japonica* water extract characterization: an inducer of interferon-gamma production mainly by the JAK-STAT pathway. *Molecules* **2016**, *21*.
162. Ito, H.; Kobayashi, E.; Li, S.; Hatano, T.; Sugita, D.; Kubo, N.; Shimura, S.; Itoh, Y.; Yoshida, T. Megastigmane glycosides and an acylated triterpenoid from *Eriobotrya japonica*. *J. Nat. Prod.* **2001**, *64*, 737–740.
163. De Tommasi, N.; De Simone, F.; Pizza, C.; Mahmood, N.; Moore, P.S.; Conti, C.; Orsi, N.; Stein, M.L. Constituents of *Eriobotrya japonica*. A study of their antiviral properties. *J. Nat. Prod.* **1992**, *55*, 1067–1073.
164. Shimizu, M.; Uemitsu, N.; Hirota, M.; Atsumoto, K.; Tezuka, Y. A new triterpene ester from *Eriobotrya japonica*. *Chem. Pharm. Bull.* **1996**, *44*, 2181–2182.
165. Chen, J.; Li, W.; Wu, J.; Ren, B.; Zhang, H. Chemical constituents of *Eriobotrya japonica* leaf. *Journal of Plant Resources and Environment* **2006**, *15*, 67–68.
166. Hong, Y.; Huang, S.; Wu, J.; Lin, S. Identification of essential oils from the leaves of 11 species of *Eriobotrya*. *Pakistan Journal of Botany* **2010**, *42*, 4379–4386.
167. Yanagisawa, H.; Ohshima, Y.; Kada, Y.; Akahashi, K.; Hibata, S. A sesquiterpene glycoside, loquatifolin A, from the leaves of *Eriobotrya japonica*. *Chem. Pharm. Bull.* **1988**, *36*, 1270–1274.
168. De Tommasi, N.; De Simone, F.; Aquino, R.; Pizza, C. Plant metabolites. New sesquiterpene glycosides from *Eriobotrya japonica*. *J. Nat. Prod.* **1990**, *53*, 810–815.
169. De Tommasi, N.; Aquino, R.; De Simone, F.; Pizza, C. Plant metabolites. New sesquiterpene and ionone glycosides from *Eriobotrya japonica*. *J. Nat. Prod.* **1992**, *55*, 1025–1032.
170. Lee, M.H.; Son, Y.K.; Han, Y.N. Tissue factor inhibitory sesquiterpene glycoside from *Eriobotrya japonica*. *Arch. Pharm. Res.* **2004**, *27*, 619–623.
171. Ao, X.; Zhao, L.; Li, H.; Ren, B.; Wu, H.; Chen, J.; Li, W. New sesquiterpene glycosides from the leaves of *Eriobotrya japonica*. *Nat. Prod. Commun.* **2015**, *10*, 1145–1147.
172. Zhao, L.; Chen, J.; Lv, H.; Ao, X.; Ren, B.; Li, W. A new sesquiterpene glycoside from the leaves of *Eriobotrya japonica*. *Chem. Nat. Compd.* **2015**, *51*, 1103–1106.
173. Chen, J.; Li, W.; Wu, J.; Ren, B.; Zhang, H. Hypoglycemic effects of a sesquiterpene glycoside isolated from leaves of loquat (*Eriobotrya japonica* (Thunb.) Lindl.). *Phytomedicine* **2008**, *15*, 98–102.
174. Chen, J.; Li, W. Progress in studies on phytochemistry and biological activity of *Folium Eriobotryae*. *Med. Aromat. Plant Sci. Biotechnol.* **2008**, *2*, 18–23.
175. Tai, Q.; Xu, X.; Guo, W. Analysis of chemical composition of essential oil in leaves of *Eriobotrya japonica* by GC-MS. *Chinese Journal of Hospital Pharmacy* **2008**, *28*, 206–208. (In Chinese)
176. Louati, S.; Simmonds, M.S.J.; Grayer, R.J.; Kite, G.C.; Damak, M. Flavonoids from *Eriobotrya japonica* (Rosaceae) growing in Tunisia. *Biochem. Syst. Ecol.* **2003**, *31*, 99–101.
177. Soung, D.Y.; Kim, J.S.; Chung, H.Y.; Jung, H.A.; Park, J.C.; Choi, J.S. Flavonoids and chlorogenic acid from *Eriobotrya japonica* scavenge peroxynitrite. *Nat. Prod. Sci.* **1999**, *5*, 80–84.
178. Ito, H.; Kobayashi, E.; Takamatsu, Y.; Li, S.H.; Hatano, T.; Sakagami, H.; Kusama, K.; Satoh, K.; Sugita, D.; Shimura, S.; Itoh, Y.; Yoshida, T. Polyphenols from *Eriobotrya japonica* and their cytotoxicity against human oral tumor cell lines. *Chem. Pharm. Bull.* **2000**, *48*, 687–693.
179. Ito, H.; Kobayashi, E.; Li, S.; Hatano, T.; Sugita, D.; Kubo, N.; Shimura, S.; Itoh, Y.; Tokuuda, H.; Nishino, H.; Yoshida, T. Antitumor activity of compounds isolated from leaves of *Eriobotrya japonica*. *J. Agr. Food Chem.* **2002**, *50*, 2400–2403.
180. Kawahara, N.; Satake, M.; Goda, Y. A new acylated flavonol glycoside from the leaves of *Eriobotrya japonica*. *Chem. Pharm. Bull.* **2002**, *50*, 1619–1620.
181. Pfisterer, P.H.; Shen, C.; Nikolovska-Coleska, Z.; Schyschka, L.; Schuster, D.; Rudy, A.; Wolber, G.; Vollmar, A.M.; Rollinger, J.M.; Stuppner, H. In silico discovery of acylated flavonol monorhamnosides from *Eriobotrya japonica* as natural, small-molecular weight inhibitors of XIAP BIR3. *Bioorganic. Med. Chem.* **2011**, *19*, 1002–1009.
182. Liu, Y.; Zhang, W.; Xu, C.; Li, X. Biological activities of extracts from loquat (*Eriobotrya japonica* Lindl.): a review. *Int. J. Mol. Sci.* **2016**, *17*.

183. Wu, H.; Cao, C.; Zhou, C. Determination of amygdalin in the fruit of *Eriobotrya japonica* Lindl by high performance liquid chromatography. *Biomed. Res.* **2017**, *28*, 8827–8831.
184. Cheng, L.; Liu, Y.; Chen, L.; Luo, J. Studies on the triterpenoidal saponins from flowers of *Eriobotrya japonica*. *Hua Xi Yi Ke Da Xue Xue Bao.* **2001**, *32*, 283–285. (In Chinese)
185. Zhou, C.; Chen, K.; Sun, C.; Chen, Q.; Zhang, W.; Li, X. Determination of oleanolic acid, ursolic acid and amygdalin in the flower of *Eriobotrya japonica* Lindl. by HPLC. *Biomed. Chromatogr.* **2007**, *21*, 755–761.
186. Li, Q. Studies on components from the flowers of *Eriobotrya japonica* L. and its biological activity. M.D. Thesis, Sichuan Normal University, Sichuan, China, April 2009. (In Chinese)
187. Merle, H.; Blázquez, M.A.; Boira, H. Chemical composition of the essential oil of *Eriobotrya japonica* (Thunb.) Lindl. flowers in the western Mediterranean area. *CIHEAM (Options Méditerranéennes: Série A. Séminaires Méditerranéens)* **2003**, *58*, 191–193.
188. Esmaeili, A.H.; Moghaddam, A.H.; Chaichi, M.J. Identification, determination, and study of antioxidative activities of hesperetin and gallic acid in hydro-alcoholic extract from flowers of *Eriobotrya japonica* (Lindl.). *Avicenna J. Phytomed.* **2014**, *4*, 260–266.
189. Shen, T.; Wu, Z. Determination of amygdalin in the flowers of *Eriobotrya japonica* by HPLC. *Chinese Traditional and Herbal Drugs* **2012**, *43*, 2438–2439. (In Chinese)
190. Li, S. Research on the aromatic components and essential oil from flowers of *Eriobotrya japonica*. M.D. Thesis, Fujian Agriculture and Forestry University, Fujian, China, April 2012. (In Chinese)
191. Chen, F.; Liu, X.; Lin, H.; Chen, L. Determination of organic acids from the fruit and leaf of loquat by ion-exchange chromatography. *Journal of Fujian Agriculture and Forestry University* **2004**, *33*, 195–199.
192. Fouedjou, R.T.; Nguielefack-Mbuyo, E.P.; Ponou, B.K.; Nguielefack, T.B.; Barboni, L.; Tapondjou, L.A. Antioxidant activities and chemical constituents of extracts from *Cordyline fruticosa* (L.) A. Chev. (Agavaceae) and *Eriobotrya japonica* (Thunb) Lindl, (Rosaceae). *Pharmacologia* **2016**, *7*, 103–113.
193. Yokota, J.; Takuma, D.; Hamada, A.; Onogawa, M.; Yoshioka, S.; Kusunose, M.; Miyamura, M.; Kyotani, S.; Nishioka, Y. Scavenging of reactive oxygen species by *Eriobotrya japonica* seed extract. *Biol. Pharm. Bull.* **2006**, *29*, 467–471.
194. Barbi, R.C.T.; Teixeira, G.L.; Hornung, P.S.; Avila, S.; Hoffmann-Ribani, R. *Eriobotrya japonica* seed as a new source of starch: assessment of phenolic compounds, antioxidant activity, thermal, rheological and morphological properties. *Food Hydrocoll.* **2018**, *77*, 646–658.
195. Jeong, J.; Lee, K.; Kim, S. Simultaneous determination of benzoic acid, caffeic acid and chlorogenic acid in seeds of *Eriobotrya japonica* and their antibacterial effect. *Journal of Applied Biological Chemistry* **2014**, *57*, 89–93.
196. Zhou, C.; Li, X.; Zhang, W.; Sun, C.; Chen, K. Oleanolic and ursolic acid in the fruit of *Eriobotrya japonica* Lindl. *J. Med. Plants Res.* **2011**, *5*, 1735–1740.
197. Agrawal, S.; Misra, K. Loquatoside - a new leucocyanin from *Eriobotrya japonica* fruits. *Planta Med.* **1980**, *38*, 277–278.
198. Hamazu, Y.; Chachin, K.; Ding, C.; Kurooka, H. Differences in surface color, flesh firmness, physiological activity, and some components of loquat fruits picked at various stages of maturity. *J. JPN. SOC. HORTIC SCI.* **1997**, *65*, 859–865.
199. Ding, C.; Chachin, K.; Ueda, Y.; Imahori, Y.; Wang, C. Metabolism of phenolic compounds during loquat fruit development. *J. Agri. Food Chem.* **2001**, *49*, 2883–2888.
200. Sadana, J.C. Carotenoids of loquat (*Eriobotrya japonica* Lindl.). *Biochem. J.* **1949**, *44*, 401–402.
201. Fröhlich, O.; Schreier, P. Volatile constituents of loquat (*Eriobotrya japonica* Lindl.) fruit. *J. Food Sci.* **1990**, *55*, 176–180.
